1 **Clinical metagenomics of bone and joint infections: a proof of concept study**

2 Etienne Ruppé<sup>1</sup>, Vladimir Lazarevic<sup>1</sup>, Myriam Girard<sup>1</sup>, William Mouton<sup>2</sup>, Tristan Ferry<sup>3</sup>, Frédéric  
3 Laurent<sup>2</sup>, Jacques Schrenzel<sup>1,4</sup>

4 1. Genomic Research Laboratory, Service of Infectious Diseases, Geneva University Hospitals, rue  
5 Gabrielle-Perret-Gentil 4, 1205 Geneva, Switzerland.

6 2. Centre International de Recherche en Infectiologie, INSERM U1111, Pathogenesis of  
7 staphylococcal infections, University of Lyon 1, Lyon, France; Department of Clinical Microbiology,  
8 Northern Hospital Group, Hospices Civils de Lyon, Lyon, France.

9 3. Centre International de Recherche en Infectiologie, INSERM U1111, Pathogenesis of  
10 staphylococcal infections, University of Lyon 1, Lyon, France; Infectious Diseases Department,  
11 Northern Hospital Group, Hospices Civils de Lyon, Lyon, France.

12 4. Bacteriology Laboratory, Service of Laboratory Medicine, Department of Genetics and Laboratory  
13 Medicine, Geneva University Hospitals, 4 rue Gabrielle-Perret-Gentil, 1205 Geneva, Switzerland.

14

15 **Key words:** next-generation sequencing, metagenomics, bone and joint infections, bio-informatics,  
16 antibiotic resistance genes.

17 **Running title:** Metagenomics in bone and joint infections

18

19 **\*Corresponding author**

20 Dr Etienne RUPPE (PharmD, PhD)

21 Genomic Research Laboratory

22 Service of Infectious Diseases

23 Geneva University Hospitals

24 4 rue Gabrielle-Perret-Gentil

25 CH-1205 Geneva

26 Switzerland

27 Phone: +41(0)22 372 93 16

28 Fax: +41(0)22 372 73 04

29 [etienne.ruppe@hcuge.ch](mailto:etienne.ruppe@hcuge.ch)

1 **Article's main point:** We applied metagenomic sequencing to 24 bone and joint infection samples,  
2 and showed that it was a promising tool to complement, but not yet to replace conventional methods  
3 in order to detect the bacterial pathogens and their antibiotic susceptibility patterns.

4

1 **Abstract (250 words)**

2 **Background.** Bone and joint infections (BJI) are severe infections that require a tailored and  
3 protracted antibiotic treatment. The diagnostic of BJI relies on the culture of surgical specimens, yet  
4 some bacteria would not grow because of extreme oxygen sensitivity or fastidious growth. Hence,  
5 metagenomic sequencing could potentially address those limitations. In this study, we assessed the  
6 performances of metagenomic sequencing of BJI samples for the identification of pathogens and the  
7 prediction of antibiotic susceptibility.

8 **Methods.** A total of 179 samples were considered. The DNA was extracted with a kit aiming to  
9 decrease the amount of human DNA (Molzym), and sequenced on an Illumina HiSeq2500 in 2x250  
10 paired-end reads. The taxonomy was obtained by MetaPhlan2, the bacterial reads assembled with  
11 MetaSPAdes and the antibiotic resistance determinants (ARDs) identified using a database made of  
12 Resfinder+ARDs from functional metagenomic studies.

13 **Results.** We could sequence the DNA from 24 out of 179 samples. For monomicrobial samples  
14 (n=8), the presence of the pathogen was confirmed by metagenomics in all cases. For polymicrobial  
15 samples (n=16), 32/55 bacteria (58.2%) were found at the species level (41/55 [74.5%] at the genus  
16 level). Conversely, a total of 273 bacteria not found in culture were identified, 182 being possible  
17 pathogens undetected in culture and 91 contaminants. A correct antibiotic susceptibility could be  
18 inferred in 94.1% cases for monomicrobial samples and in 76.5% cases in polymicrobial samples.

19 **Conclusions.** When sufficient amounts of DNA can be extracted from samples, we found that clinical  
20 metagenomics is a potential tool to support conventional culture.

21

22

## 1 Introduction

2 Bone and joint infections (BJI) are severe infections that affect a growing number of patients [1].  
3 Along with the surgical intervention, the microbiological diagnosis is a keystone of the management of  
4 BJI in (i) identifying the bacteria causing the infection and (ii) assessing their susceptibility to  
5 antibiotics. Currently, this is achieved by culturing surgical samples on various media and conditions,  
6 together with a long time of incubation to recover fastidiously-growing bacteria that can be involved in  
7 BJI. Still, some bacteria would not grow under these conditions because of extreme oxygen  
8 sensitivity, a prior antibiotic intake or metabolic issues (quiescent bacteria in chronic infections).  
9 Consequently, the antibiotic treatment may not span all the bacteria involved in the infection, which  
10 can favor the relapse and the need for a new surgery.

11 Clinical metagenomics refers to the concept of sequencing all the DNA (i.e. all the genomes) present  
12 in a clinical sample with the purpose of recovering pathogens and inferring their antibiotic  
13 susceptibility pattern [2]. This new, culture-independent method takes advantages of the thrilling  
14 development of next-generation sequencing (NGS) technologies since the mid-2000s. These  
15 sequencers typically yield thousands to millions of short reads (sequences of size ranging from 100  
16 bp to a few kbp), which virtually enables to recover the sequences of all the genes present in the  
17 sample, yet in a disorganized fashion. Substantial bio-informatics efforts are thereby needed to re-  
18 construct and re-order the original sequences in genomes, and are referred to as the assembly  
19 process. Hence, various information such as the taxonomic identification of the present species,  
20 antibiotic resistance determinants (ARDs), mutations (as compared to a reference genome or  
21 sequence), single nucleotide polymorphisms (for clonality assessment) and virulence genes can be  
22 found.

23 Clinical metagenomics is an emerging field in medicine. So far, a few attempts to use metagenomics  
24 on clinical samples have been performed (on urines [3,4], cerebrospinal fluid or brain biopsy [5,6],  
25 blood [7] and skin granuloma [8]) likely because of the high price of metagenomics and the complexity  
26 of the management of sequence data for clinical microbiologists. To the best of our knowledge,  
27 metagenomics has never been applied to BJI samples.

28 As for the inference of antibiotic susceptibility testing from the genomic information, a few studies  
29 focusing on *Escherichia coli*, *Klebsiella pneumoniae*, *Mycobacterium tuberculosis* and  
30 *Staphylococcus aureus* have constantly showed excellent correlations between the analysis of the

1 genomic content of antibiotic resistance determinants (ARDs) and the phenotype [9–15] while  
2 performances were not as good for *Pseudomonas aeruginosa* [16]. Furthermore in metagenomic  
3 data, the possible presence of multiple pathogens poses the issue of linking ARDs to their original  
4 host in order to infer its antibiotic susceptibility pattern [3]. So far no method has been proposed to  
5 address this question.

6 Applying metagenomics in the context of BJI is thus seducing in that 1) there is no limit in the number  
7 of species and ARDs that could be detected (as opposed to PCR-based methods which detect  
8 targeted bacteria), 2) unculturable bacteria, fastidious growers (such as *Propionibacterium* sp.) or  
9 bacteria altered by prior antibiotic use would be recovered, and 3) the antibiotic susceptibility  
10 inference would benefit from both the detection of ARDs (such as *mecA*, *qnr*, *dfr*, *erm*, etc.) and the  
11 identification of mutations leading to resistance to key antibiotics used in BJI. Here, our main objective  
12 is to assess the performances of clinical metagenomics in BJI in terms of pathogen identification and  
13 inference of AST, as compared with conventional microbiology (gold standard).

14

## 15 **Material and methods**

### 16 *Samples*

17 We initially included 179 per-operative samples recovered from 47 patients (range 1-8 samples per  
18 patient). All but 2 (swabs) were solid specimens. The quantity of material for each non-swab sample  
19 (n=177) was macroscopically estimated: less than 1 mL (n=100), from 1 to 10 mL (n=60) and more  
20 than 10 mL (n=17). The samples were collected from September 2015 to January 2016 in the  
21 orthopedic departments of the CRIOAc (Regional Reference Center for Complex Osteo-Orticular  
22 Infections), Lyon, France (<https://www.crioac-lyon.fr>) and stored at –80°C until shipment in dry ice to  
23 the Genomic Research Laboratory in Geneva on April 13, 2016. The samples had previously been  
24 cultured (see Supplementary Methods for the detailed protocol): a single bacteria or yeast was  
25 recovered for 104 out of 179 samples (58.1%), the remaining yielding 2 (24/179, 13.4%), 3 (26/179,  
26 14.5%), 4 (14/179, 7.8%) or 5 (11/179, 6.1%) bacteria and yeasts. The exploitation of the collection  
27 used in this study was approved by the Ethical Committee of the Lyons University Hospital  
28 (September 25, 2014).

29

### 30 *DNA manipulations*

1 The detailed protocol for DNA manipulations can be found in the Supplementary Methods. Briefly, the  
2 DNA from samples was extracted by the Ultra-Deep Microbiome Prep kit (Molzym, Bremen,  
3 Germany) according to the manufacturer's instructions (Version 2.0) for tissue samples. The  
4 concentration of bacterial and human DNA was determined by qPCR experiments as described  
5 previously [17]. About 3 ng of DNA were sent to Fasteris (Plan-les-Ouates, Switzerland) for DNA  
6 purification and subsequent sequencing in Rapid Run mode for 2x250+8 cycles on an Illumina HiSeq  
7 2500 instrument (with a HiSeq Rapid Flow Cell v2).

8

### 9 *Bioinformatic methods*

10 The pipeline of read processing is displayed in Figure 1, and detailed in the Supplementary methods.  
11 Briefly, quality-filtered reads were processed with MetaPhlan2 to get the taxonomic profile of the  
12 microbial community [18,19]. The bacterial reads assembled using metaSPAdes [20]. The  
13 identification of ARDs was achieved in mapping the total quality-filtered reads onto a database made  
14 of the ARDs from the ResFinder database [21] and ARDs from functional metagenomic studies [22–  
15 24]. To get the depth of sequencing of the bacterial species and of the ARDs in samples, and the  
16 single nucleotide variants (SNVs), we separately mapped the reads against the contigs assigned to  
17 one given species and against the ARDs identified in this sample. The same pipeline was applied to all  
18 samples after downsizing to 1M reads.

19

## 20 **Results**

### 21 *DNA extraction*

22 We first extracted the samples for which the quantity of material exceeded or was equal to 1 mL  
23 (n=77), and the two swabs. We recovered more than 1 pg bacterial DNA mostly for samples that had  
24 grown at >100 CFUs (Supplementary Figure 1, panel A), while the concentration of human DNA did  
25 not seem to correlate with bacterial load (Supplementary Figure 1, panel B). Accordingly, the  
26 remaining samples, that had grown at least 100 CFUs (n=25), were submitted to extraction. In total,  
27 the DNA of 104 samples was extracted, from which 24 met the requirement to be sequenced (*i.e.*  
28 contained at least 1 pg/ $\mu$ L bacterial DNA, and less than 99% human DNA, Supplementary Table 1).  
29 Among the 24 samples and all throughout the manuscript, we will refer as monomicrobial (n=8) and

1 polymicrobial (n=16) samples those which respectively yielded one and more than one bacterial  
2 species in culture.

3

#### 4 *Bioinformatics*

5 After trimming, we obtained a mean number of 10,046,084 reads per sample (range 4,128,425-  
6 14,549,687, Supplementary Table). With the Kraken classifier, the mean rate of classified reads (as  
7 bacteria, archaea or virus) was 27.9% (range 1.8-85.7, Supplementary Table 1). Of note, the  
8 classification rate was correlated to the proportion of bacterial DNA as found by qPCR (Pearson's  
9 correlation test,  $p < 0.001$ , Supplementary Figure 2). The assembly of the classified reads with  
10 metaSPAdes yielded a mean number of contigs of 10,444 (range 3,087-18,513, Supplementary Table  
11 1), for a mean total number of base pairs of 8.3M (range 2.9M-16.5M, Supplementary Table 1). Of  
12 note, the total number of base pairs of contigs was higher in polymicrobial samples than in the  
13 monomicrobial ones (respectively 9.7M vs. 5.5M, t test  $p < 0.05$ , Supplementary Figure 3). The mean  
14 size of the contigs was 805 bp (median 369 bp, maximum 445,300 bp, Supplementary Figure 4).

15

#### 16 *Identification of the pathogens*

17 In monomicrobial samples (n=8, Table 2), 8/8 (100%) of the pathogens identified by culture were  
18 found by MetaPhlAn2, mostly at very high abundances (over 94.6%) at the exception of sample 46 in  
19 which *Streptococcus anginosus* was only found at a 2.2% abundance (Figure 2). In polymicrobial  
20 samples (n=16, Table 2), 55 bacterial species were found in culture 32 of which (58.2%) were found  
21 by MetaPhlAn2. At the genus level the match rate increased to 41/55 (74.5%). The presence of all  
22 bacteria found by culture in a given sample was confirmed by MetaPhlAn2 for 11/24 (45.8%) samples  
23 at the species level, including 3/16 (18.8%) for polymicrobial infections. At the genus level, 15/24  
24 (62.5%) samples were in agreement with cultures, including 7/16 (43.8%) samples with polymicrobial  
25 infections.

26

#### 27 *Identification of other bacteria and possible contaminants*

28 Apart from the bacteria that were found in culture (n=63) in the 24 positive samples, a total of 273  
29 bacteria, not found in culture, were identified by MetaPhlAn2 (Figures 2 and 3). One  
30 (*Propionibacterium acnes*) was found in 20/24 samples (supplementary Figures 5 and 6). Moreover,

1 the abundance of *P. acnes* in samples was negatively correlated to their total DNA concentration  
2 sample (Supplementary Figure 5), supporting that *P. acnes* was a contaminant in this study [25,26].  
3 For other species, such correlation could not be tested because of their low occurrence in samples.  
4 We identified 66 likely contaminants (Figure 3, Supplementary Table 2), some being commonly found  
5 in culture (such as *Micrococcus luteus*) or as reagents contaminants [27]. Others were unexpected  
6 such as *Borrelia* sp. (samples 103, 104, 108 and 110) or *Rickettsia japonica* (sample 117). Still, the  
7 taxonomic assignment of the contigs did not confirm the presence of those species and manual blastn  
8 of reads against the NCBI nr database supported that they were likely *in silico* contaminants (data not  
9 shown) [27,28]. Besides, we identified 25 species that could be due to a misclassification of reads to  
10 closely related bacteria, such as in samples 184 (where *Corynebacterium striatum* was found in  
11 culture, and some metagenomic reads were identified as *Dermabacter* sp. and *Corynebacterium*  
12 *pyruviciproducens*), samples from patient C (19, 103, 104 where *Acinetobacter baumannii* and  
13 *Achromobacter xylosoxidans* were found in culture, and some reads were identified as from other  
14 *Acinetobacter* spp., *Achromobacter* spp., or *Advenella kashmirensis*, a bacterium close to  
15 *Achromobacter*) (Supplementary Table 2). Hence, a total of 182 bacteria not recovered in culture and  
16 not acknowledged as contaminants were identified in metagenomic sequencing. For one sample that  
17 was monomicrobial in culture (sample 46, that yielded *S. anginosus*), 38 other species were identified  
18 by metagenomics. Interestingly, these species appeared to be commonly found in the oropharyngeal  
19 microbiota, which was consistent with the site of the infection (mandible). In polymicrobial samples  
20 such as samples 4 and 140 (patient B), 90 and 158 (patient H), 108 and 181 (patient I), metagenomic  
21 sequencing identified several more anaerobic bacteria (range 3-40, see Supplementary Table 2, in  
22 consistence with the sporadic isolation of such bacteria in the routine culture of these of samples. In  
23 both samples 4 and 140 from patient B, the most abundant species was *Propionibacterium*  
24 *propionicum* (respective abundances of 71.5% and 43.2%) that was not found in culture. Arguments  
25 in contradiction with *P. propionicum* being a contaminant in these samples are that the species found  
26 in other samples was *P. acnes*, and that the abundance of *P. propionicum* was high (supplementary  
27 Figure 6) whereas the abundance of *P. acnes* was low in the samples where it was identified.

28

29 *Identification of clones within species*



1 Based on this assumption that in case of multiple clones within one species, the SNVs would be  
2 homogeneously distributed along the contigs (see Supplementary methods and Supplementary  
3 Figure 7), we found polyclonal populations for 29 of the 74 (39.2%) bacterial species that were tested.  
4 Among the bacteria that were found in culture and that were tested (n=32), 8 (25%) displayed a  
5 polyclonal population: *Morganella morganii* (samples 4 and 140), *Streptococcus agalactiae* (samples  
6 103 and 117), *Staphylococcus aureus* (samples 28 and 110), *S. anginosus* (sample 158) and  
7 *Pseudomonas aeruginosa* (sample 128). Moreover, we observed that for *M. morganii* (samples 4 and  
8 140), no mutations on the topoisomerases of *M. morganii* were found in the sample 140, while in  
9 sample 4 the Ser83Ile and Ser84Ile were found in GyrA and ParC, respectively. This suggests  
10 that one population of *M. morganii* was susceptible to fluoroquinolones and the other was not. In  
11 culture though, only the fluoroquinolone resistant clone was found.

12

### 13 *Antibiotic resistance determinants, linkage with the host and inference of antibiotic susceptibility*

14 A total of 151 ARDs (61 unique) were identified from the 24 samples (range 2-22, Table 2). The most  
15 frequent ARD families were beta-lactamases (n=30), Tet(M) (n=26), Erm (n=18) and Dfr (n=16). For  
16 monomicrobial samples, we assumed that the ARDs identified by metagenomics were expressed by  
17 the bacterium that was recovered in culture. Considering together (i) the antibiotic class the ARDs  
18 usually confer resistance to, (ii) the antibiotic susceptibility of wild-type species and (iii) the analysis of  
19 the sequence of specific genes (*gyrA*, *parC*, *rpoB*), we could infer a *in silico* susceptibility in  
20 agreement with the phenotypic susceptibility in 94.1% (111/118) cases (Figure 4 and supplementary  
21 tables, a case being defined as the susceptibility testing of one antibiotic for one sample). Of note, the  
22 six major errors (overprediction of resistance as compared to culture) originated from sample 46  
23 where anaerobic bacteria and likely associated ARDs were found in metagenomic sequencing but not  
24 in culture. For polymicrobial samples, as we could not rely on the depth of sequencing of ARDs and  
25 bacterial contigs to infer some connections (Supplementary Figure 8), we separately considered the  
26 ARDs and the bacteria found in the sample (Supplementary Table 2). Accordingly, we inferred a  
27 correct susceptibility in 76.5% (192/251) cases. Very major errors mostly occurred because some  
28 bacteria with specific resistance patterns were not detected in sequencing (Supplementary Table 2).  
29 Conversely and along with the observations with monomicrobial samples, most major errors occurred

1 because some bacteria and ARDs were found in sequencing but not in culture. Of note, the prediction  
2 of susceptibility to fluoroquinolones was correct in 100% (24/24) samples

3

#### 4 *Influence of downsizing the samples to 1M reads*

5 We ran the same pipeline analysis onto the 24 samples downsized at 1M reads. We observed that  
6 the taxonomic distribution did not apparently change for the most abundant species (Supplementary  
7 Figure 9), but the mean genome coverage of the main pathogen was lower in the downsized group  
8 than in the full-reads group (3.9% vs. 8.9%, Student paired test  $p < 0.001$ , Supplementary Figure 10).  
9 Also, only 86 ARDs were found after downsizing while 151 were detected before (Student paired test  
10  $p < 0.001$ , Supplementary Figure 9). Of note, the impact of downsizing was observed in both  
11 monomicrobial and polymicrobial samples (Supplementary Figures 11 and 12).

12

#### 13 **Discussion**

14 The main result of this study is that we showed that metagenomic sequencing could be a potential  
15 tool in the diagnostic of BJI. Indeed for monomicrobial infections, the pathogen was identified in 100%  
16 (8/8) samples and the antibiotic susceptibility prediction was successful in 94.1% (111/128) cases. In  
17 case of polymicrobial samples, the high abundance of several bacteria (mostly anaerobes) did  
18 occasionally prevent from the correct identification of the pathogens and their antibiotic susceptibility  
19 profiles. Accordingly, our findings support that currently, metagenomic sequencing of BJI samples  
20 could not replace conventional methods based on culture due to the limitations encountered when  
21 several bacterial populations are present in the samples, but rather be performed in support.

22 Interestingly, metagenomic sequencing yielded in some ways more information than culture. First,  
23 metagenomic sequencing identified many more bacterial species than culture. Besides likely  
24 contaminants, some bacteria were probably true positive that were not detected by culture and may  
25 not have been targeted by the selected antibiotic regimen. Second, we could observe within species  
26 at least two clonal populations, which could differ in their susceptibility to antibiotics as we observed  
27 for fluoroquinolones in *M. morganii*. In all, using metagenomic data could help to tailor the antibiotic  
28 regimen for the treatment of BJI, and the added-value of clinical metagenomics in BJI should now be  
29 assessed.

1 However, there are several hindrances to the application of metagenomic sequencing to BJI samples.  
2 First, we could only sequence 24 out of 179 samples, due to a low amount of bacterial DNA that could  
3 be recovered from the samples. This is the main limitation of this study as it reduced the diversity of  
4 clinical situations that we could address. Nonetheless, the samples from this study have been frozen  
5 and thawed, which decays bacteria and releases DNA. As the DNA extraction method we used  
6 eliminates free DNA after lysing eukaryotic cells, it is likely that we could have sequenced more  
7 samples if they would not have been frozen. This said, recovering enough bacterial DNA (in terms of  
8 quantity and proportion with respect to human DNA) remains challenging. Also, the high cost of NGS  
9 currently prevents its routine application. We tested the impact of a lower depth of sequencing and  
10 showed that despite the taxonomic profiles of the bacterial populations were similar, the inference of  
11 antibiotic susceptibility was less accurate due to a lower recovery of genes involved in antibiotic  
12 resistance. Our results suggest that clinical metagenomics should indeed benefit from the highest  
13 depth of sequencing. Another limitation of the study is that we did not concomitantly sequence a  
14 negative control to identify the putative contaminants that would originate from the sample process.  
15 Some contaminants have been identified in studies using 16S rDNA amplifications [27], but some of  
16 them are also met as BJI pathogens (e.g. *P. acnes*). A solution to this issue would be to include a  
17 negative control for every run or at least when new batches of kits are used, and to subtract from the  
18 clinical samples the bacteria found in the negative control based on their abundance [29].

19 Besides, our observations suggest that clinical metagenomics will soon require, as for clinical  
20 microbiology, a specific expertise combining clinical, biological and bioinformatic skills in order to infer  
21 clinically relevant results from metagenomic data. In this perspective, the development of clinical  
22 metagenomics will need the definition of quality standards, e.g. what is the sufficient genome  
23 coverage for a given bacterium to consider that its antibiotic susceptibility profile can be likely inferred.  
24 In the long term, algorithms should be built to provide clinicians with clear data and robust algorithms  
25 to support clinical decisions.

26 In conclusion, we showed that metagenomic sequencing of BJI samples was a potential tool to  
27 support conventional methods. In this perspective, its main limitations (DNA extraction, cost and data  
28 management) should be tackled, and the clinical benefit provided by clinical metagenomics should  
29 now be assessed in a prospective fashion.

## 1   **References**

- 2   1.   Grammatico-Guillon L, Baron S, Gettner S, et al. Bone and joint infections in hospitalized patients  
3       in France, 2008: clinical and economic outcomes. *J. Hosp. Infect.* **2012**; 82:40–48.
- 4   2.   Ruppé E, Baud D, Schicklin S, Guigon G, Schrenzel J. Clinical metagenomics for the  
5       management of hospital- and healthcare-acquired pneumonia. *Future Microbiol.* **2015**; Ahead of  
6       print.
- 7   3.   Hasman H, Saputra D, Sicheritz-Ponten T, et al. Rapid whole-genome sequencing for detection  
8       and characterization of microorganisms directly from clinical samples. *J. Clin. Microbiol.* **2014**;  
9       52:139–146.
- 10  4.   Schmidt K, Mwaigwisya S, Crossman LC, et al. Identification of bacterial pathogens and  
11       antimicrobial resistance directly from clinical urines by nanopore-based metagenomic  
12       sequencing. *J. Antimicrob. Chemother.* **2016**;
- 13  5.   Wilson MR, Naccache SN, Samayoa E, et al. Actionable diagnosis of neuroleptospirosis by next-  
14       generation sequencing. *N. Engl. J. Med.* **2014**; 370:2408–2417.
- 15  6.   Frémond M-L, Pérot P, Muth E, et al. Next-Generation Sequencing for Diagnosis and Tailored  
16       Therapy: A Case Report of Astrovirus-Associated Progressive Encephalitis. *J. Pediatr. Infect. Dis.*  
17       *Soc.* **2015**; 4:e53–57.
- 18  7.   Gyarmati P, Kjellander C, Aust C, Song Y, Öhrmalm L, Giske CG. Metagenomic analysis of  
19       bloodstream infections in patients with acute leukemia and therapy-induced neutropenia. *Sci.*  
20       *Rep.* **2016**; 6:23532.
- 21  8.   Bodemer C, Sauvage V, Mahlaoui N, et al. Live rubella virus vaccine long-term persistence as an  
22       antigenic trigger of cutaneous granulomas in patients with primary immunodeficiency. *Clin.*  
23       *Microbiol. Infect. Off. Publ. Eur. Soc. Clin. Microbiol. Infect. Dis.* **2014**; 20:O656–663.
- 24  9.   Köser CU, Holden MTG, Ellington MJ, et al. Rapid whole-genome sequencing for investigation of  
25       a neonatal MRSA outbreak. *N. Engl. J. Med.* **2012**; 366:2267–2275.

- 1 10. Köser CU, Bryant JM, Becq J, et al. Whole-genome sequencing for rapid susceptibility testing of  
2 M. tuberculosis. *N. Engl. J. Med.* **2013**; 369:290–292.
- 3 11. Zankari E, Hasman H, Kaas RS, et al. Genotyping using whole-genome sequencing is a realistic  
4 alternative to surveillance based on phenotypic antimicrobial susceptibility testing. *J. Antimicrob.*  
5 *Chemother.* **2013**; 68:771–777.
- 6 12. Gordon NC, Price JR, Cole K, et al. Prediction of *Staphylococcus aureus* antimicrobial resistance  
7 by whole-genome sequencing. *J. Clin. Microbiol.* **2014**; 52:1182–1191.
- 8 13. Stoesser N, Batty EM, Eyre DW, et al. Predicting antimicrobial susceptibilities for *Escherichia coli*  
9 and *Klebsiella pneumoniae* isolates using whole genomic sequence data. *J. Antimicrob.*  
10 *Chemother.* **2013**; 68:2234–2244.
- 11 14. Tyson GH, McDermott PF, Li C, et al. WGS accurately predicts antimicrobial resistance in  
12 *Escherichia coli*. *J. Antimicrob. Chemother.* **2015**;
- 13 15. Bradley P, Gordon NC, Walker TM, et al. Rapid antibiotic-resistance predictions from genome  
14 sequence data for *Staphylococcus aureus* and *Mycobacterium tuberculosis*. *Nat. Commun.* **2015**;  
15 6:10063.
- 16 16. Kos VN, Déraspe M, McLaughlin RE, et al. The resistome of *Pseudomonas aeruginosa* in  
17 relationship to phenotypic susceptibility. *Antimicrob. Agents Chemother.* **2015**; 59:427–436.
- 18 17. Lazarevic V, Gaïa N, Girard M, François P, Schrenzel J. Comparison of DNA extraction methods  
19 in analysis of salivary bacterial communities. *PloS One* **2013**; 8:e67699.
- 20 18. Segata N, Waldron L, Ballarini A, Narasimhan V, Jousson O, Huttenhower C. Metagenomic  
21 microbial community profiling using unique clade-specific marker genes. *Nat. Methods* **2012**;  
22 9:811–814.
- 23 19. Truong DT, Franzosa EA, Tickle TL, et al. MetaPhlAn2 for enhanced metagenomic taxonomic  
24 profiling. *Nat. Methods* **2015**; 12:902–903.

- 1 20. Nurk S, Meleshko D, Korobeynikov A, Pevzner P. metaSPAdes: a new versatile de novo  
2 metagenomics assembler. ArXiv160403071 Q-Bio **2016**; Available at:  
3 <http://arxiv.org/abs/1604.03071>. Accessed 13 July 2016.
- 4 21. Zankari E, Hasman H, Cosentino S, et al. Identification of acquired antimicrobial resistance  
5 genes. *J. Antimicrob. Chemother.* **2012**; 67:2640–2644.
- 6 22. Sommer MOA, Dantas G, Church GM. Functional characterization of the antibiotic resistance  
7 reservoir in the human microflora. *Science* **2009**; 325:1128–1131.
- 8 23. Moore AM, Patel S, Forsberg KJ, et al. Pediatric fecal microbiota harbor diverse and novel  
9 antibiotic resistance genes. *PloS One* **2013**; 8:e78822.
- 10 24. Pehrsson EC, Tsukayama P, Patel S, et al. Interconnected microbiomes and resistomes in low-  
11 income human habitats. *Nature* **2016**; 533:212–216.
- 12 25. Lazarevic V, Gaia N, Emonet S, et al. Challenges in the culture-independent analysis of oral and  
13 respiratory samples from intubated patients. *Front. Cell. Infect. Microbiol.* **2014**; 4:65.
- 14 26. Willner D, Daly J, Whiley D, Grimwood K, Wainwright CE, Hugenholtz P. Comparison of DNA  
15 extraction methods for microbial community profiling with an application to pediatric  
16 bronchoalveolar lavage samples. *PloS One* **2012**; 7:e34605.
- 17 27. Salter SJ, Cox MJ, Turek EM, et al. Reagent and laboratory contamination can critically impact  
18 sequence-based microbiome analyses. *BMC Biol.* **2014**; 12:87.
- 19 28. Gonzalez A, Vázquez-Baeza Y, Pettengill JB, Ottesen A, McDonald D, Knight R. Avoiding  
20 Pandemic Fears in the Subway and Conquering the Platypus. *mSystems* **2016**; 1:e00050–16.
- 21 29. Lazarevic V, Gaia N, Girard M, Schrenzel J. Decontamination of 16S rRNA gene amplicon  
22 sequence datasets based on bacterial load assessment by qPCR. *BMC Microbiol.* **2016**; 16:73.
- 23 30. Wood DE, Salzberg SL. Kraken: ultrafast metagenomic sequence classification using exact  
24 alignments. *Genome Biol.* **2014**; 15:R46.

1 31. Gurevich A, Saveliev V, Vyahhi N, Tesler G. QUASt: quality assessment tool for genome  
2 assemblies. *Bioinforma. Oxf. Engl.* **2013**; 29:1072–1075.

3

4 **Funding source**

5 None.

6

7 **Conflict of interest**

8 All authors declare that they have no conflict of interest.

9

10 **Acknowledgements**

11 None.

12

1 **Tables**

2 **Table 1:** Characteristics of the 14 patients for whom 24 samples were sequenced. ASA: American Society of Anesthesiologists.

3

| Patient | Samples      | Age | Gender | ASA score | Body mass index | Post-operative infection (type of surgery) | Delay between surgery and infection | Body site                      | Material involved     |
|---------|--------------|-----|--------|-----------|-----------------|--------------------------------------------|-------------------------------------|--------------------------------|-----------------------|
| A       | 2, 66, 28    | 51  | M      | 2         | 30.4            | Yes (material)                             | <1 month                            | Ankle                          | Osteosynthesis        |
| B       | 4, 140       | 50  | F      | 2         | 39.8            | No                                         | NA                                  | Clavicle                       | None                  |
| C       | 19, 103, 104 | 54  | M      | 2         | 24.1            | Yes (material)                             | <1 month                            | Toe                            | Osteosynthesis        |
| D       | 110          | 66  | M      | 2         | 29.4            | Yes (material)                             | Between 1 and 3 months              | Tibia                          | Osteosynthesis        |
| E       | 42           | 61  | F      | 3         | 50.6            | Yes (material)                             | <1 month                            | Knee                           | Total knee prosthesis |
| F       | 46           | 63  | M      | 2         | 18.0            | Yes (material)                             | <1 month                            | Mandible                       | Osteosynthesis        |
| G       | 59, 117, 136 | 69  | M      | 2         | 25.5            | Yes (bone resection)                       | NA                                  | Tibia                          | None                  |
| H       | 90, 158      | 64  | F      | 2         | 21.2            | No                                         | NA                                  | Sacrum                         | None                  |
| I       | 108, 181     | 86  | F      | 2         | 26.7            | Yes (material)                             | Between 1 and 3 months              | Knee                           | Total knee prosthesis |
| J       | 121, 172     | 50  | F      | 1         | 24.2            | No                                         | NA                                  | Tibia                          | None                  |
| K       | 128          | 86  | F      | 2         | 30.1            | No                                         | >3 months                           | Knee                           | Osteosynthesis        |
| L       | 171          | 51  | M      | 1         | 25.6            | Yes (material)                             | >3 months                           | Tibia                          | Osteosynthesis        |
| M       | 178          | 87  | F      | 3         | 26.1            | Yes (material)                             | <1 month                            | Knee                           | Total knee prosthesis |
| N       | 184          | 60  | M      | 3         | 34.3            | No                                         | NA                                  | Greater trochanter and ischiur | None                  |

4

5

6



1 **Table 2:** Description of the 24 samples sequenced in this study. WT: wild-type. NA: not assembled.

| Patient | Sample number | Monomicrobial or polymicrobial | Culture (proportion in %)                                                                                                                                                                                                                                                                                                                                                                                                                                                                                                                                                                                                                                                                                                                                                                                                                                                                                                                                                                  | Species identified in metagenomic sequencing (≥0.1% abundance)                                                                                                                                                                                                                                                                                                                                                                                                                                                                                                                                                                                                                                                                                                  | Antibiotic resistance genes (Resfinder)                                                                                                | Antibiotic resistance genes (functional metagenomic studies) | GyrA                                              | ParC                                              | RpoB                                   |
|---------|---------------|--------------------------------|--------------------------------------------------------------------------------------------------------------------------------------------------------------------------------------------------------------------------------------------------------------------------------------------------------------------------------------------------------------------------------------------------------------------------------------------------------------------------------------------------------------------------------------------------------------------------------------------------------------------------------------------------------------------------------------------------------------------------------------------------------------------------------------------------------------------------------------------------------------------------------------------------------------------------------------------------------------------------------------------|-----------------------------------------------------------------------------------------------------------------------------------------------------------------------------------------------------------------------------------------------------------------------------------------------------------------------------------------------------------------------------------------------------------------------------------------------------------------------------------------------------------------------------------------------------------------------------------------------------------------------------------------------------------------------------------------------------------------------------------------------------------------|----------------------------------------------------------------------------------------------------------------------------------------|--------------------------------------------------------------|---------------------------------------------------|---------------------------------------------------|----------------------------------------|
| A       | 2             | Polymicrobial                  | Staphylococcus aureus (29.4), Klebsiella pneumoniae (5.9), Klebsiella oxytoca (5.9), Peptoniphilus asaccharolyticus (29.4), Finegoldia magna (29.4)                                                                                                                                                                                                                                                                                                                                                                                                                                                                                                                                                                                                                                                                                                                                                                                                                                        | Staphylococcus aureus (99.6)                                                                                                                                                                                                                                                                                                                                                                                                                                                                                                                                                                                                                                                                                                                                    | blaZ, norA                                                                                                                             | None                                                         | WT ( <i>S. aureus</i> )                           | WT ( <i>S. aureus</i> )                           | D320N ( <i>S. aureus</i> )             |
| B       | 4             | Polymicrobial                  | Morganella morganii (99.9), Streptococcus anginosus (0.1)                                                                                                                                                                                                                                                                                                                                                                                                                                                                                                                                                                                                                                                                                                                                                                                                                                                                                                                                  | Morganella morganii (5.6), Propionibacterium propionium (71.5), Bacteroides fragilis (14.2), Prevotella bivia (4.1), Atopobium rimae (3.0), Parvimonas unclassified (1.0), Parvimonas micra (0.2), Prevotella buccalis (0.1)                                                                                                                                                                                                                                                                                                                                                                                                                                                                                                                                    | aadA1, aph(3)-Ia, blaDHA-1, catA1, catA2, cepA, cfxA3, dfrA1, erm(A), erm(B), strA, sul2, tet(D), tet(M), tet(Q)                       | dfr, dfr, van, tet(B)                                        |                                                   |                                                   |                                        |
| C       | 19            | Polymicrobial                  | Acinetobacter baumannii complex (90.8), Streptococcus agalactiae (9.2)                                                                                                                                                                                                                                                                                                                                                                                                                                                                                                                                                                                                                                                                                                                                                                                                                                                                                                                     | Acinetobacter baumannii complex (22.1), Streptococcus agalactiae (73.1), Finegoldia magna (1.7), Acinetobacter_pitii_calcoaceticus nosocomialis (0.9), Corynebacterium resistens (0.9), Helicobacterium kunzii (0.7), Advenella kashmiriensis (0.3), Propionibacterium acnes (0.2), Achromobacter unclassified (0.1), Achromobacter piechaudi (0.1)                                                                                                                                                                                                                                                                                                                                                                                                             | blaADC-25, blaOXA-328, erm(B), tet(M)                                                                                                  | None                                                         | WT ( <i>A. baumannii</i> , <i>S. agalactiae</i> ) | WT ( <i>A. baumannii</i> , <i>S. agalactiae</i> ) | WT ( <i>S. agalactiae</i> )            |
| A       | 28            | Polymicrobial                  | Staphylococcus aureus (33.3), Klebsiella pneumoniae (16.7), Klebsiella oxytoca (16.7), Finegoldia magna (16.7), Peptostreptococcus anaerobius (16.7)                                                                                                                                                                                                                                                                                                                                                                                                                                                                                                                                                                                                                                                                                                                                                                                                                                       | Staphylococcus aureus (90.3), Finegoldia magna (4.3), Peptoniphilus harei (3.7), Propionibacterium acnes (0.9)                                                                                                                                                                                                                                                                                                                                                                                                                                                                                                                                                                                                                                                  | ant(6)-Ia, aph(3)-III, norA                                                                                                            | tet(O)                                                       | WT ( <i>S. aureus</i> )                           | WT ( <i>S. aureus</i> )                           | D320N ( <i>S. aureus</i> )             |
| E       | 42            | Polymicrobial                  | Staphylococcus epidermidis (50.0), Streptococcus mitis/oralis (50.0)                                                                                                                                                                                                                                                                                                                                                                                                                                                                                                                                                                                                                                                                                                                                                                                                                                                                                                                       | Staphylococcus epidermidis (99.1), Propionibacterium acnes (0.4)                                                                                                                                                                                                                                                                                                                                                                                                                                                                                                                                                                                                                                                                                                | aac(6)-aph(2''), aph(3)-Ia, blaZ, erm(C), fosB, mecA                                                                                   | blaTEM                                                       | S84Y ( <i>S. epidermidis</i> )                    | S80F, D84Y ( <i>S. epidermidis</i> )              | T700S, D837E ( <i>S. epidermidis</i> ) |
| F       | 46            | Monomicrobial                  | Streptococcus anginosus (100.0)                                                                                                                                                                                                                                                                                                                                                                                                                                                                                                                                                                                                                                                                                                                                                                                                                                                                                                                                                            | Streptococcus anginosus (2.2), Mogibacterium_sp CM50 (34.5), Olsenella uii (13.8), Atopobium_sp_oral_taxon 199 (13.0), Peptostreptococcus stomatis (6.9), Parvimonas unclassified (6.7), Freibacterium fastidiosum (6.3), Pseudoramibacter alactolyticus (5.6), Slackia unclassified (3.2), Slackia exigua (2.2), Alloprevotella tannerae (2.0), Prevotella cris (0.8), Eubacterium infirmum (0.5), Treponema mallophilum (0.4), Parvimonas micra (0.3), Prevotella baroniae (0.2), Treponema socranskii (0.2), Bacteroidetes_bacterium_oral_taxon 272 (0.2), Dialister inuis (0.2), Prevotella denticola (0.2), Tannerella forsythia (0.1), Porphyromonas unenonis (0.1), Treponema vincentii (0.1), Treponema denticola (0.1), Peptoniphilus lacrimalis (0.1) | ctxA3, Isa(C), tet(M)                                                                                                                  | dfr, dfr, dfr, tet(M), van                                   | C96Y                                              | WT                                                | D492A                                  |
| G       | 59            | Monomicrobial                  | Streptococcus agalactiae (100.0)                                                                                                                                                                                                                                                                                                                                                                                                                                                                                                                                                                                                                                                                                                                                                                                                                                                                                                                                                           | Streptococcus agalactiae (99.9)                                                                                                                                                                                                                                                                                                                                                                                                                                                                                                                                                                                                                                                                                                                                 | erm(B), tet(M)                                                                                                                         | None                                                         | WT                                                | WT                                                | WT                                     |
| A       | 66            | Polymicrobial                  | Staphylococcus aureus (27.8), Klebsiella pneumoniae (11.1), Klebsiella oxytoca (5.6), Finegoldia magna (27.8), Peptoniphilus asaccharolyticus (27.8)                                                                                                                                                                                                                                                                                                                                                                                                                                                                                                                                                                                                                                                                                                                                                                                                                                       | Staphylococcus aureus (99.9)                                                                                                                                                                                                                                                                                                                                                                                                                                                                                                                                                                                                                                                                                                                                    | blaZ, norA                                                                                                                             | None                                                         | WT ( <i>S. aureus</i> )                           | WT ( <i>S. aureus</i> )                           | D320N ( <i>S. aureus</i> )             |
| H       | 94            | Polymicrobial                  | Streptococcus anginosus (82.6), Enterococcus faecalis (2.5), Bacteroides fragilis (8.3), Clostridium ramosum (4.1), Clostridium clostridioforme (2.5)                                                                                                                                                                                                                                                                                                                                                                                                                                                                                                                                                                                                                                                                                                                                                                                                                                      | Streptococcus anginosus (0.6), Olsenella_sp_oral_taxon 809 (55.9), Pseudoramibacter alactolyticus (9.6), Atopobium_sp_oral_taxon 199 (8.4), Eggerthella unclassified (6.6), Slackia unclassified (5.8), Mogibacterium_sp CM50 (5.3), Slackia exigua (1.8), Peptoniphilus_sp_oral_taxon 375 (1.6), Anaerococcus lactolyticus (1.0), Peptoniphilus harei (0.6), Finegoldia magna (0.5), Parvimonas unclassified (0.4), Peptoniphilus lacrimalis (0.4), Olsenella uii (0.3), Eggerthella lenta (0.3), Parvimonas micra (0.1), Porphyromonas asaccharolytica (0.1), Actinomyces europaeus (0.1), Actinomyces turicensis (0.1), Coriobacteriaceae_bacterium BV3Ac1 (0.1), Porphyromonas somerae (0.1), Subdoligranulum unclassified (0.1)                            | ant(6)-Ia, aph(3)-III, erm(A), erm(B), erm(X), strA, sul2, tet(32), tet(M), tet(W)                                                     | dfr, tet(O)                                                  |                                                   |                                                   |                                        |
| C       | 103           | Polymicrobial                  | Acinetobacter baumannii complex (90.8), Streptococcus agalactiae (9.2)                                                                                                                                                                                                                                                                                                                                                                                                                                                                                                                                                                                                                                                                                                                                                                                                                                                                                                                     | Acinetobacter baumannii complex (66.8), Streptococcus agalactiae (26.9), Acinetobacter_pitii_calcoaceticus nosocomialis (2.7), Finegoldia magna (1.5), Corynebacterium resistens (0.4), Staphylococcus simulans (0.4), Propionibacterium acnes (0.3), Staphylococcus lugdunensis (0.2), Achromobacter unclassified (0.1), Helicobacterium kunzii (0.1), Bordetella unclassified (0.1), Advenella kashmiriensis (0.1)                                                                                                                                                                                                                                                                                                                                            | blaADC-25, blaOXA-328, erm(B), tet(M)                                                                                                  | None                                                         | WT ( <i>A. baumannii</i> , <i>S. agalactiae</i> ) | WT ( <i>A. baumannii</i> , <i>S. agalactiae</i> ) | WT ( <i>S. agalactiae</i> )            |
| C       | 104           | Polymicrobial                  | Acinetobacter baumannii complex (90.8), Streptococcus agalactiae (9.2), Achromobacter xylosoxidans (0.0)                                                                                                                                                                                                                                                                                                                                                                                                                                                                                                                                                                                                                                                                                                                                                                                                                                                                                   | Acinetobacter baumannii complex (70.1), Streptococcus agalactiae (24.2), Acinetobacter_pitii_calcoaceticus nosocomialis (3.9), Corynebacterium resistens (1.1), Propionibacterium acnes (0.2), Achromobacter unclassified (0.1), Bordetella unclassified (0.1), Enhydrobacter aerosaccus (0.1)                                                                                                                                                                                                                                                                                                                                                                                                                                                                  | blaADC-25, blaOXA-328, tet(M)                                                                                                          | None                                                         | WT ( <i>A. baumannii</i> , <i>S. agalactiae</i> ) | WT ( <i>A. baumannii</i> , <i>S. agalactiae</i> ) | WT ( <i>S. agalactiae</i> )            |
| I       | 108           | Polymicrobial                  | Enterococcus faecalis (1.0), Peptoniphilus asaccharolyticus (99.0)                                                                                                                                                                                                                                                                                                                                                                                                                                                                                                                                                                                                                                                                                                                                                                                                                                                                                                                         | Peptoniphilus harei (98.7), Propionibacterium acnes (0.7), Streptococcus agalactiae (0.1), Deinococcus unclassified (0.1), Acinetobacter unclassified (0.1)                                                                                                                                                                                                                                                                                                                                                                                                                                                                                                                                                                                                     | None                                                                                                                                   | tet(M), tet(M)                                               | NA                                                | NA                                                | NA                                     |
| D       | 110           | Monomicrobial                  | Staphylococcus aureus (100.0)                                                                                                                                                                                                                                                                                                                                                                                                                                                                                                                                                                                                                                                                                                                                                                                                                                                                                                                                                              | Staphylococcus aureus (98.2), Propionibacterium acnes (1.7)                                                                                                                                                                                                                                                                                                                                                                                                                                                                                                                                                                                                                                                                                                     | blaZ, norA                                                                                                                             | None                                                         | WT                                                | WT                                                | WT                                     |
| G       | 117           | Monomicrobial                  | Streptococcus agalactiae (100.0)                                                                                                                                                                                                                                                                                                                                                                                                                                                                                                                                                                                                                                                                                                                                                                                                                                                                                                                                                           | Streptococcus agalactiae (99.9), Rickettsia japonica (0.1)                                                                                                                                                                                                                                                                                                                                                                                                                                                                                                                                                                                                                                                                                                      | erm(B), tet(M)                                                                                                                         | None                                                         | WT                                                | WT                                                | WT                                     |
| J       | 121           | Monomicrobial                  | Staphylococcus aureus (100.0)                                                                                                                                                                                                                                                                                                                                                                                                                                                                                                                                                                                                                                                                                                                                                                                                                                                                                                                                                              | Staphylococcus aureus (99.6), Propionibacterium acnes (0.4)                                                                                                                                                                                                                                                                                                                                                                                                                                                                                                                                                                                                                                                                                                     | blaZ, norA                                                                                                                             | None                                                         | WT                                                | NA                                                | WT                                     |
| K       | 128           | Polymicrobial                  | Proteus mirabilis (NA), Klebsiella oxytoca (NA), Pseudomonas aeruginosa (MA)                                                                                                                                                                                                                                                                                                                                                                                                                                                                                                                                                                                                                                                                                                                                                                                                                                                                                                               | Klebsiella oxytoca (74.2), Pseudomonas aeruginosa (0.8), Klebsiella unclassified (23.5), Rothia mucilaginosa (0.3), Pseudomonas unclassified (0.3), Propionibacterium acnes (0.2)                                                                                                                                                                                                                                                                                                                                                                                                                                                                                                                                                                               | aac(3)-IIa, aac(6)-Ib-cr, blaCTX-M-11, blaOXA-1, blaOXY-2-8, dfrA14, fosA, oxqA, oxqB, QnrB1                                           | Putative beta-lactamase, blaTEM, vanB                        | T83I ( <i>K. oxytoca</i> )                        | S80I ( <i>K. oxytoca</i> )                        |                                        |
| G       | 136           | Monomicrobial                  | Streptococcus agalactiae (100.0)                                                                                                                                                                                                                                                                                                                                                                                                                                                                                                                                                                                                                                                                                                                                                                                                                                                                                                                                                           | Streptococcus agalactiae (99.8), Propionibacterium acnes (0.1)                                                                                                                                                                                                                                                                                                                                                                                                                                                                                                                                                                                                                                                                                                  | erm(B), tet(M), tet(M)                                                                                                                 | None                                                         | WT                                                | WT                                                | WT                                     |
| B       | 140           | Polymicrobial                  | Morganella morganii (78.9), Streptococcus anginosus (0.1), Prevotella bivia (7.7), Bifidobacterium (7.7), Peptoniphilus (7.7)                                                                                                                                                                                                                                                                                                                                                                                                                                                                                                                                                                                                                                                                                                                                                                                                                                                              | Morganella morganii (14.6), Prevotella bivia (6.6), Propionibacterium propionium (43.2), Bacteroides fragilis (24.4), Atopobium rimae (8.3), Parvimonas unclassified (1.2), Dermabacter_sp HFH0086 (1.0), Parvimonas micra (0.3), Anaeroglobus geminatus (0.1), Proteus mirabilis (0.1)                                                                                                                                                                                                                                                                                                                                                                                                                                                                         | aadA1, aph(3)-Ia, blaMOR, blaTEM-1A, catA1, catA2, cepA, cfxA3, dfrA1, dfrA14, erm(B), QnrS1, strA, sul1, sul2, tet(D), tet(M), tet(Q) | dfr, dfr, tet(B), van                                        |                                                   |                                                   |                                        |
| H       | 158           | Polymicrobial                  | Enterococcus faecalis (3.8), Streptococcus anginosus (1.3), Olsenella_sp_oral_taxon 809 (69.8), Mogibacterium_sp CM50 (6.5), Slackia unclassified (3.8), Peptoniphilus harei (1.6), Atopobium_sp_oral_taxon 199 (1.5), Finegoldia magna (1.4), Pseudoramibacter alactolyticus (1.2), Anaerococcus lactolyticus (1.2), Peptoniphilus_sp_oral_taxon 375 (1.1), Slackia exigua (1.0), Porphyromonas asaccharolytica (0.8), Actinomyces turicensis (0.8), Subdoligranulum unclassified (0.7), Peptoniphilus lacrimalis (0.7), Eggerthella unclassified (0.4), Olsenella uii (0.4), Anaerococcus vaginalis (0.2), Lachnospiraceae_bacterium_5_1_57FAA (0.2), Dialister inuis (0.2), Clostridium clostridioforme (0.2), Actinomyces europaeus (0.2), Porphyromonas somerae (0.2), Clostridiales_bacterium BV3C26 (0.1), Anaerococcus obsiensis (0.1), Parvimonas unclassified (0.1), Helicobacterium kunzii (0.1), Prevotella timonensis (0.1), Facklamia hominis (0.1), Eggerthella lenta (0.1) | ant(6)-Ia, aph(3)-III, cmc, erm(A), erm(B), erm(X), Isa(A), strA, strB, tet(M)                                                                                                                                                                                                                                                                                                                                                                                                                                                                                                                                                                                                                                                                                  | ctxA, dfr, dfr, dfr, tet(O), tet(O)                                                                                                    |                                                              |                                                   |                                                   |                                        |
| L       | 171           | Polymicrobial                  | Staphylococcus aureus (40.0), Staphylococcus lugdunensis (20.0), Anaerococcus vaginalis (40.0)                                                                                                                                                                                                                                                                                                                                                                                                                                                                                                                                                                                                                                                                                                                                                                                                                                                                                             | Staphylococcus aureus (97.8), Anaerococcus vaginalis (1.6), Propionibacterium acnes (0.5), Bartonella unclassified (0.1)                                                                                                                                                                                                                                                                                                                                                                                                                                                                                                                                                                                                                                        | blaZ, norA                                                                                                                             | None                                                         | WT ( <i>S. aureus</i> )                           | WT ( <i>S. aureus</i> )                           | WT ( <i>S. aureus</i> )                |
| J       | 172           | Monomicrobial                  | Staphylococcus aureus (100.0)                                                                                                                                                                                                                                                                                                                                                                                                                                                                                                                                                                                                                                                                                                                                                                                                                                                                                                                                                              | Staphylococcus aureus (94.6), Micrococcus luteus (3.1), Propionibacterium acnes (2.2)                                                                                                                                                                                                                                                                                                                                                                                                                                                                                                                                                                                                                                                                           | norA                                                                                                                                   | blaTEM                                                       | WT                                                | NA                                                | WT                                     |
| M       | 178           | Monomicrobial                  | Staphylococcus epidermidis (100.0)                                                                                                                                                                                                                                                                                                                                                                                                                                                                                                                                                                                                                                                                                                                                                                                                                                                                                                                                                         | Staphylococcus epidermidis (99.7), Propionibacterium acnes (0.2)                                                                                                                                                                                                                                                                                                                                                                                                                                                                                                                                                                                                                                                                                                | aac(6)-aph(2''), blaZ, erm(A), fusB, mecA, spe, vat(B), vga(A), vga(B)                                                                 | None                                                         | S84F                                              | S80Y                                              | WT                                     |
| I       | 181           | Polymicrobial                  | Enterococcus faecalis (4.5), Staphylococcus carnosus (4.5), Staphylococcus lugdunensis (45.5), Propionimicrobium_45.5, Anaerococcus vaginalis (0.0)                                                                                                                                                                                                                                                                                                                                                                                                                                                                                                                                                                                                                                                                                                                                                                                                                                        | Enterococcus faecalis (62.5), Propionimicrobium (1.2), Anaerococcus vaginalis (0.5), Peptoniphilus harei (20.7), Actinomyces neui (7.5), Finegoldia magna (7.1), Anaerococcus obsiensis (0.2), Propionibacterium acnes (0.1)                                                                                                                                                                                                                                                                                                                                                                                                                                                                                                                                    | aph(3)-III, Isa(A)                                                                                                                     | dfr, blaTEM, tet(M)                                          | WT ( <i>E. faecalis</i> )                         | WT ( <i>E. faecalis</i> )                         | WT ( <i>E. faecalis</i> )              |
| N       | 184           | Polymicrobial                  | Escherichia coli (27.3), Enterococcus faecalis (45.5), Corynebacterium striatum (27.3)                                                                                                                                                                                                                                                                                                                                                                                                                                                                                                                                                                                                                                                                                                                                                                                                                                                                                                     | Enterococcus faecalis (2.3), Corynebacterium striatum (4.7), Finegoldia magna (53.6), Dermabacter_sp HFH0086 (13.7), Peptoniphilus harei (10.3), Variabaculum cambriense (8.6), Anaerococcus vaginalis (2.3), Propionibacterium acnes (2.0), Anaerococcus obsiensis (0.9), Escherichia_unclassified (0.5), Corynebacterium pyruvicoproductens (0.1)                                                                                                                                                                                                                                                                                                                                                                                                             | erm(A), erm(X)                                                                                                                         | tet(M), tet(O)                                               | S83I ( <i>F. magna</i> )                          |                                                   |                                        |

2  
3

1 **Figures**

2 **Figure 1:** Bioinformatic analysis performed in this study. ARDs: antibiotic resistance determinants. Fastq: format for the files that embeds the read sequences  
3 and their per-base quality score. FMG: functional metagenomics; ARDs: antibiotic resistance determinants; ORF: open reading frame.

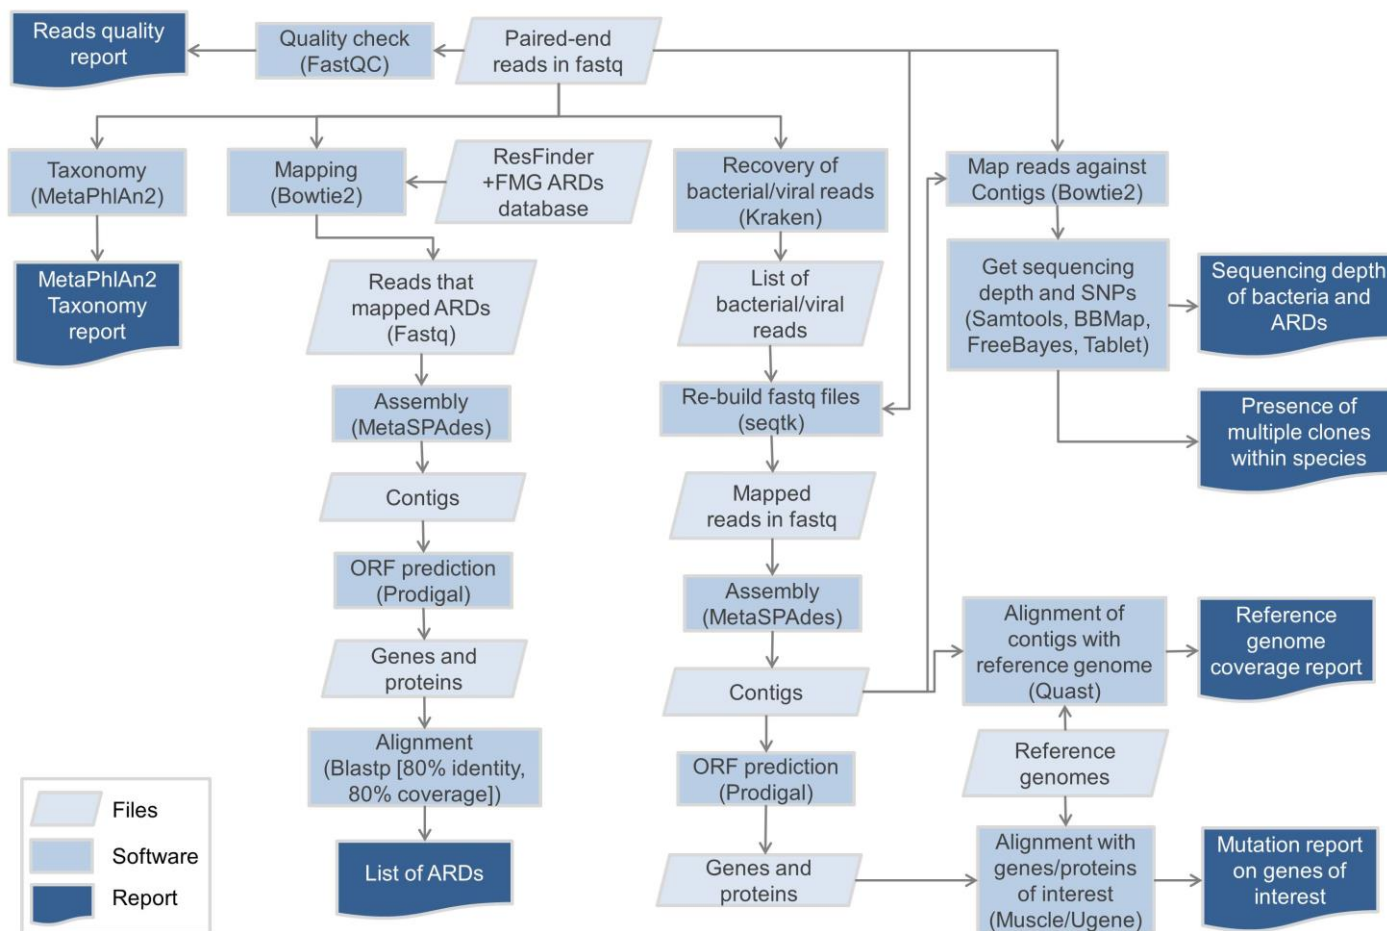

4

5

1 **Figure 2:** Proportions of the species recovered in culture and from reads (using MetaPhlAn2 [19]).

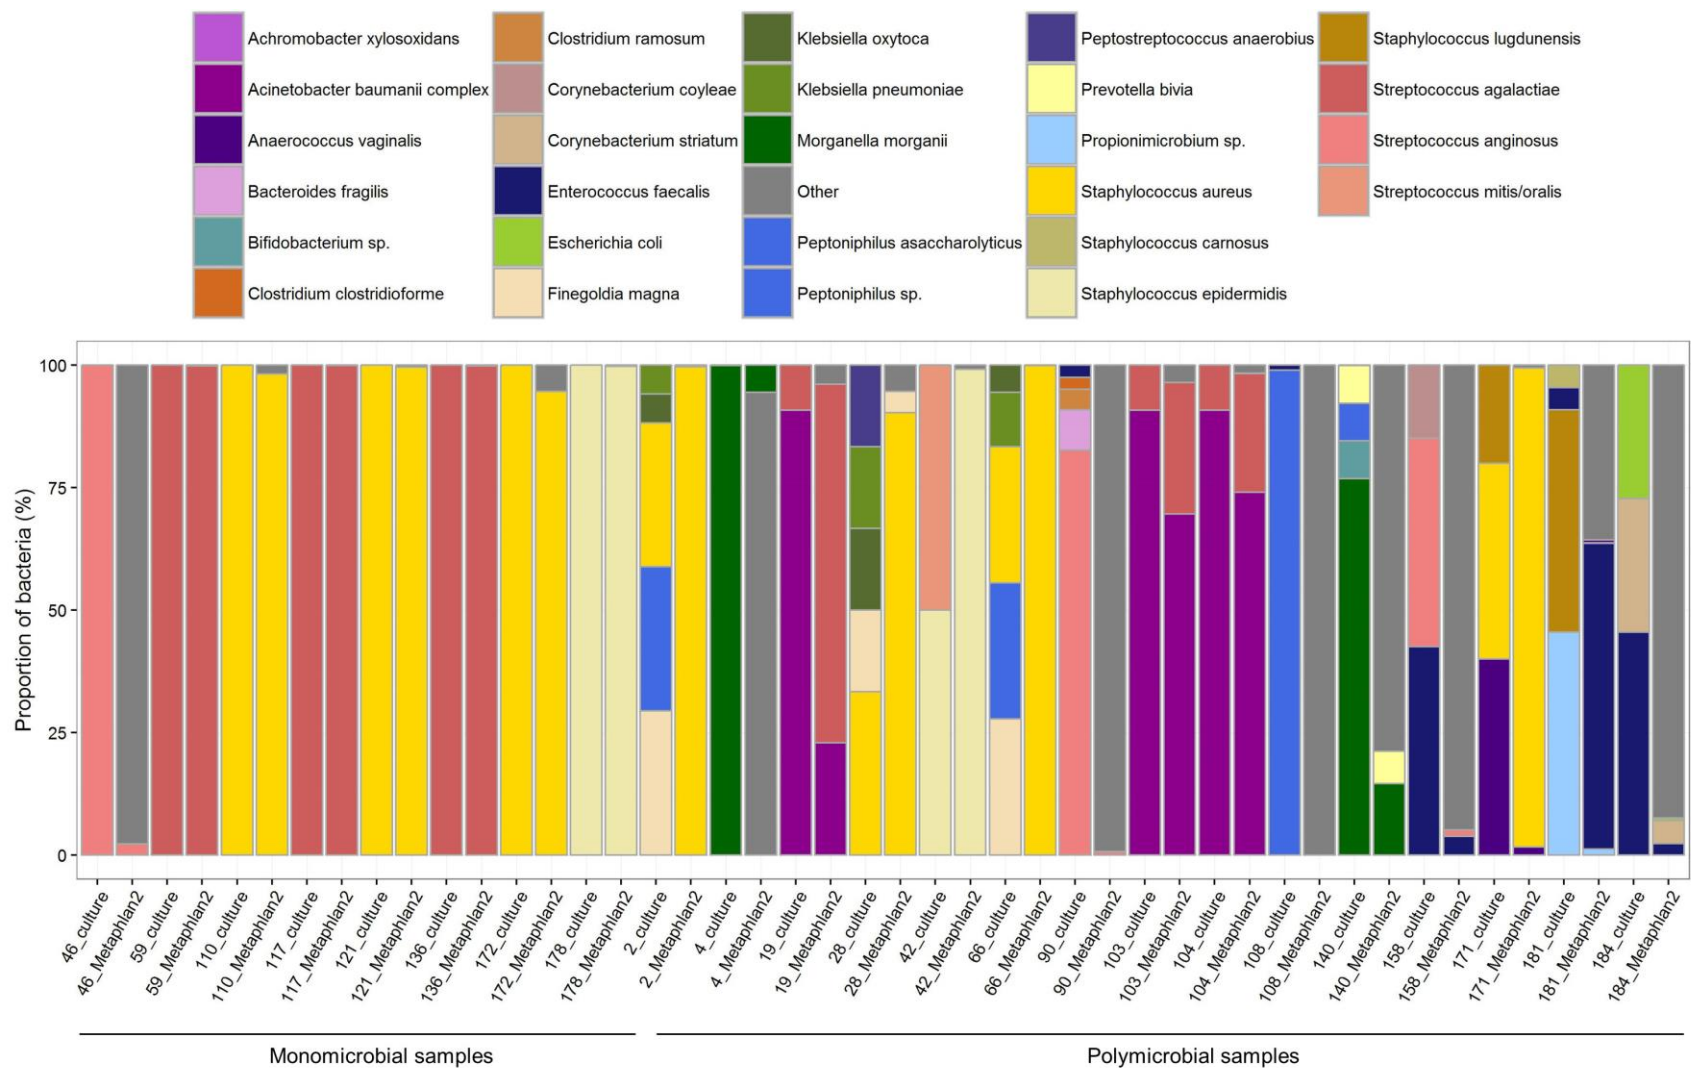

2  
3



1 **Figure 4:** Antibiotic susceptibility inference from metagenomic data compared to culture and conventional antibiotic susceptibility testing (gold standard).  
 2 1GC/2GC, 3GC, 4GC: 1<sup>st</sup>, 2<sup>nd</sup>, 3<sup>rd</sup> and 4<sup>th</sup> generation cephalosporins, respectively. MLS: macrolides, lincosamides, streptogramins. Correct: metagenomic  
 3 result consistent with the result given by conventional methods. Very major error: metagenomic data did not predict antibiotic resistance while at least one  
 4 bacteria identified by conventional methods was resistant to this antibiotic. Major error: metagenomic data predicted antibiotic resistance while all the bacteria  
 5 identified by conventional methods were susceptible. Not tested: no molecule from the antibiotic class was tested with conventional methods.

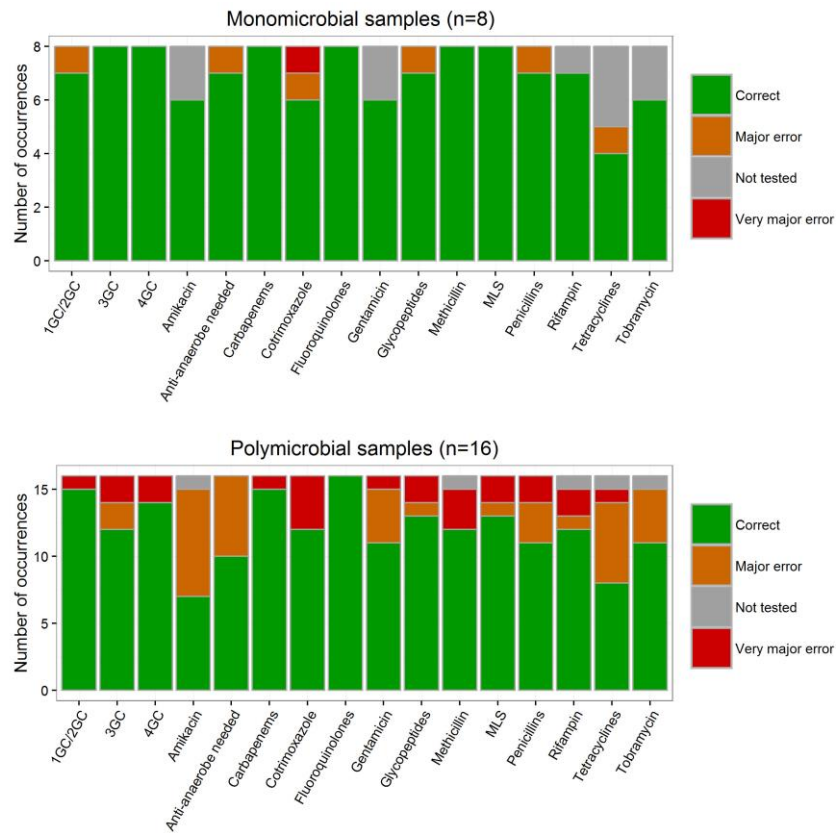

6

1 **Supplementary Figures**

2 **Supplementary Figure 1:** Total quantity of bacteria obtained in culture and concentrations of bacterial (A) and human DNA (B) for 102 samples for which  
3 DNA was extracted. DNA concentrations in DNA extracts were determined by qPCR (see methods). The shaded grey area depicts the 95% confidence  
4 interval around the linear regression line. The X-axis is square-root transformed for visibility purposes. One sequenced sample is missing (sample 128)  
5 because the bacterial concentrations were missing. Eventually, 19 and 7 samples with null bacterial and human DNA concentrations are not shown in the  
6 panel A and B, respectively.

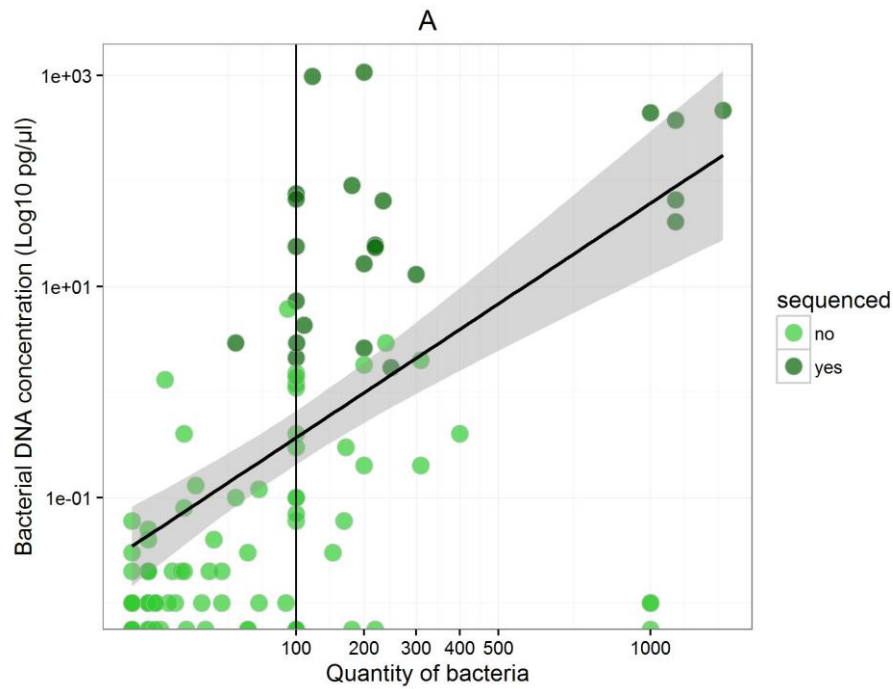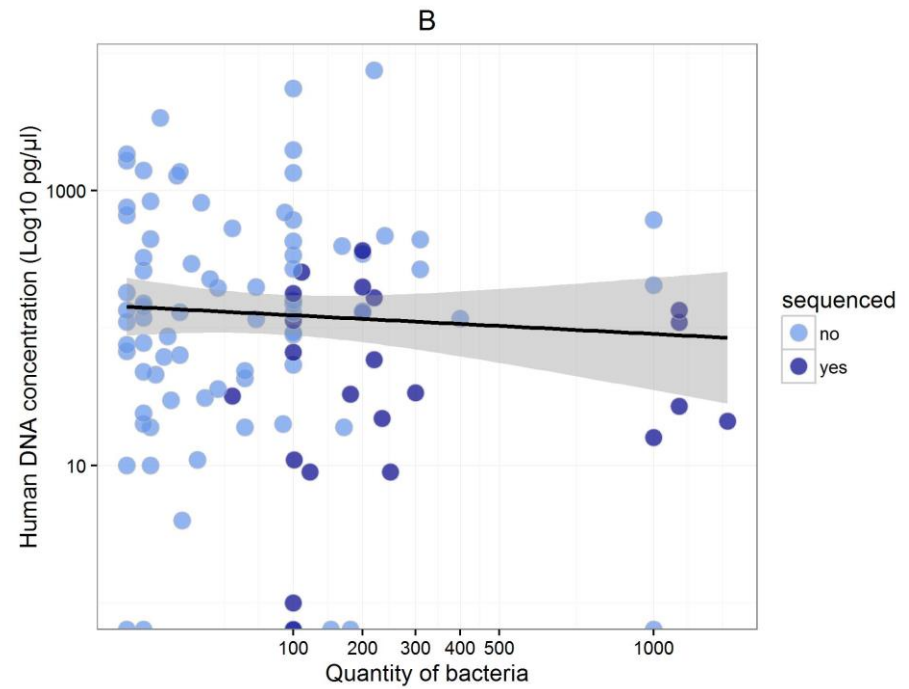

7

8

- 1 **Supplementary Figure 2:** Proportion of bacterial DNA as determined by qPCR (the proportion being calculated as the percentage of bacterial DNA on the
- 2 total DNA [bacterial and human]) on the X-axis, and proportion of the quality-filtered reads classified as bacterial, archaeal or viral by the Kraken classifier.
- 3 The shaded grey area depicts the 95% confidence interval around the linear regression line.

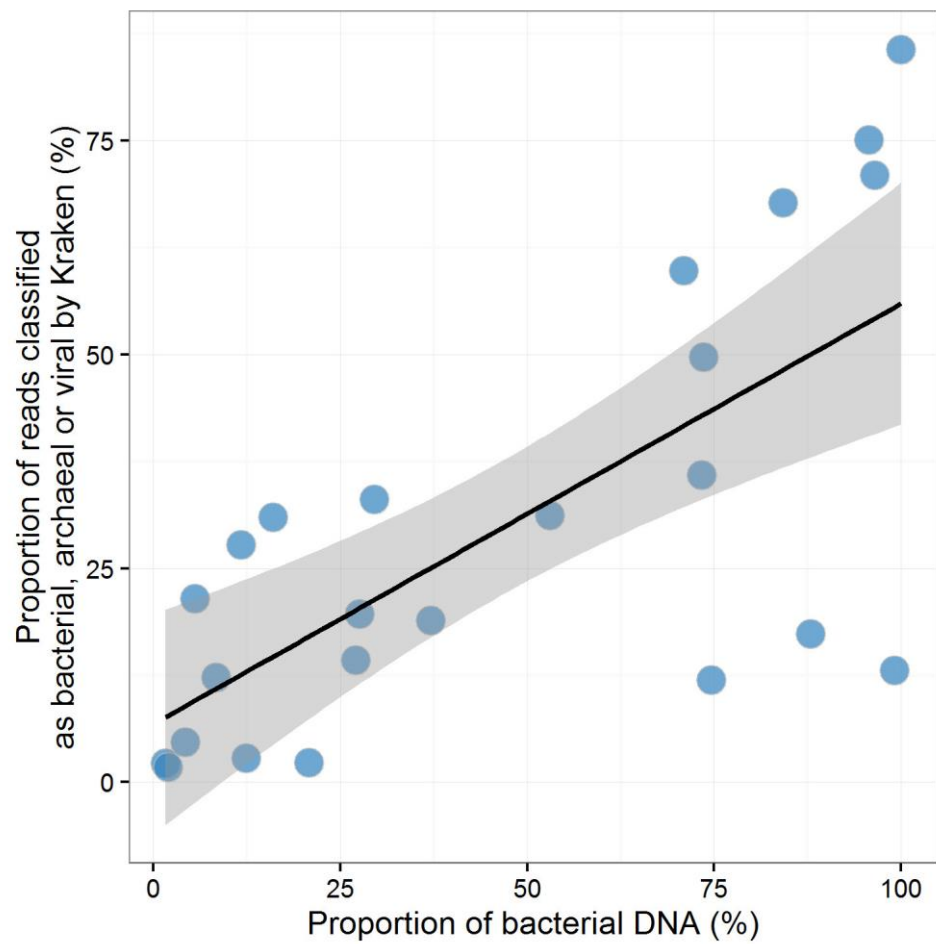

4

1 **Supplementary Figure 3:** Boxplots of the the length of summed contigs (A), the total number of contigs (B), the total number of contigs exceeding 1000bp  
2 (C), the N50 (D), the L50 (E) according to the number of bacteria recovered in culture (monomicrobial or polymicrobial). The contigs were obtained by the  
3 assembly by MetaSPAdes [20] of reads classified by Kraken [30]. The parameters showed on this figure were obtained by Quast [31]. \*:  $p < 0.05$ ; NS: not  
4 significant. The boxplot limits represents (from bottom to roof) the 25<sup>th</sup>, 50<sup>th</sup> (median) and 75<sup>th</sup> percentiles.

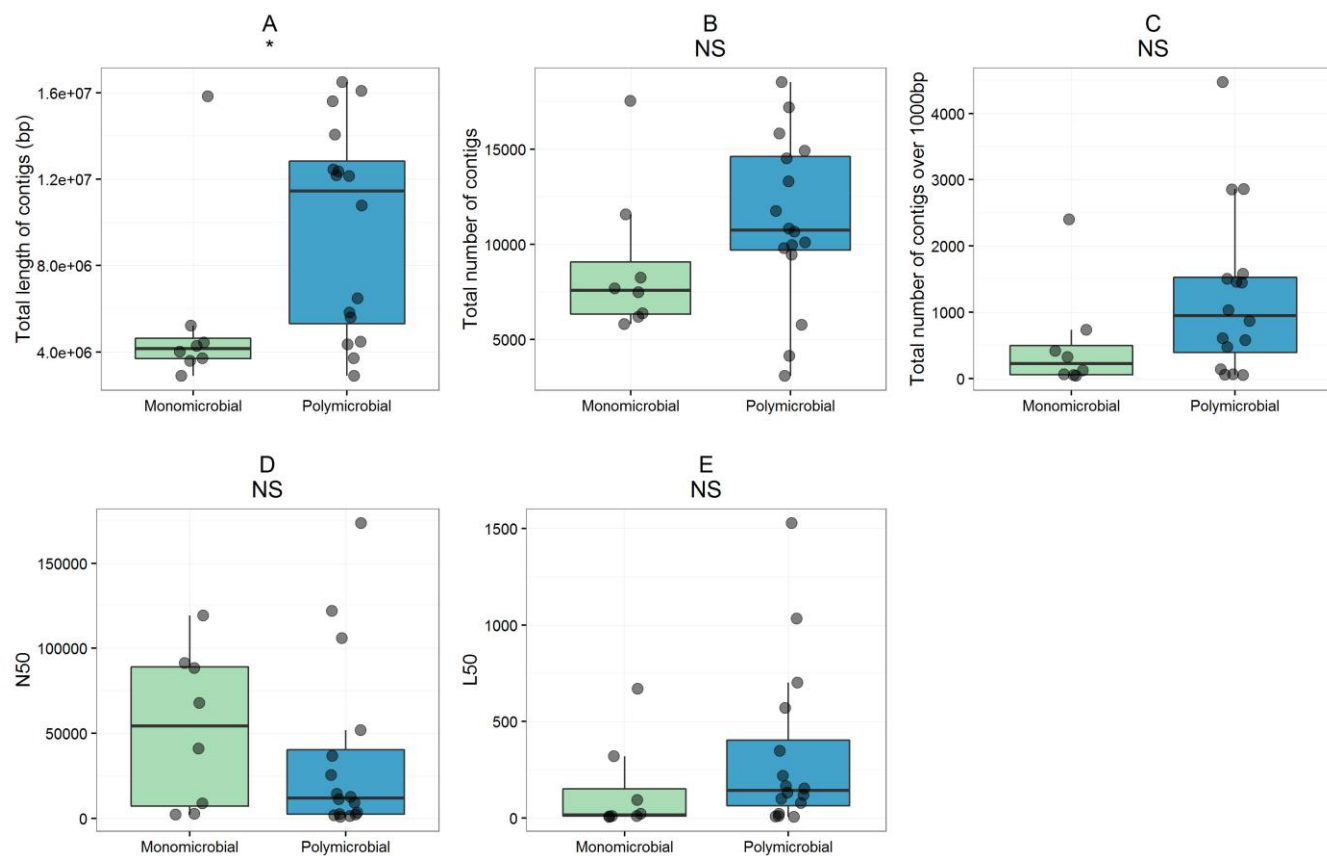

5

6



1 **Supplementary Figure 4:** Distribution of the size of the contigs for all the samples (n=24). Both Y-axis and X-axis are square-root transformed.

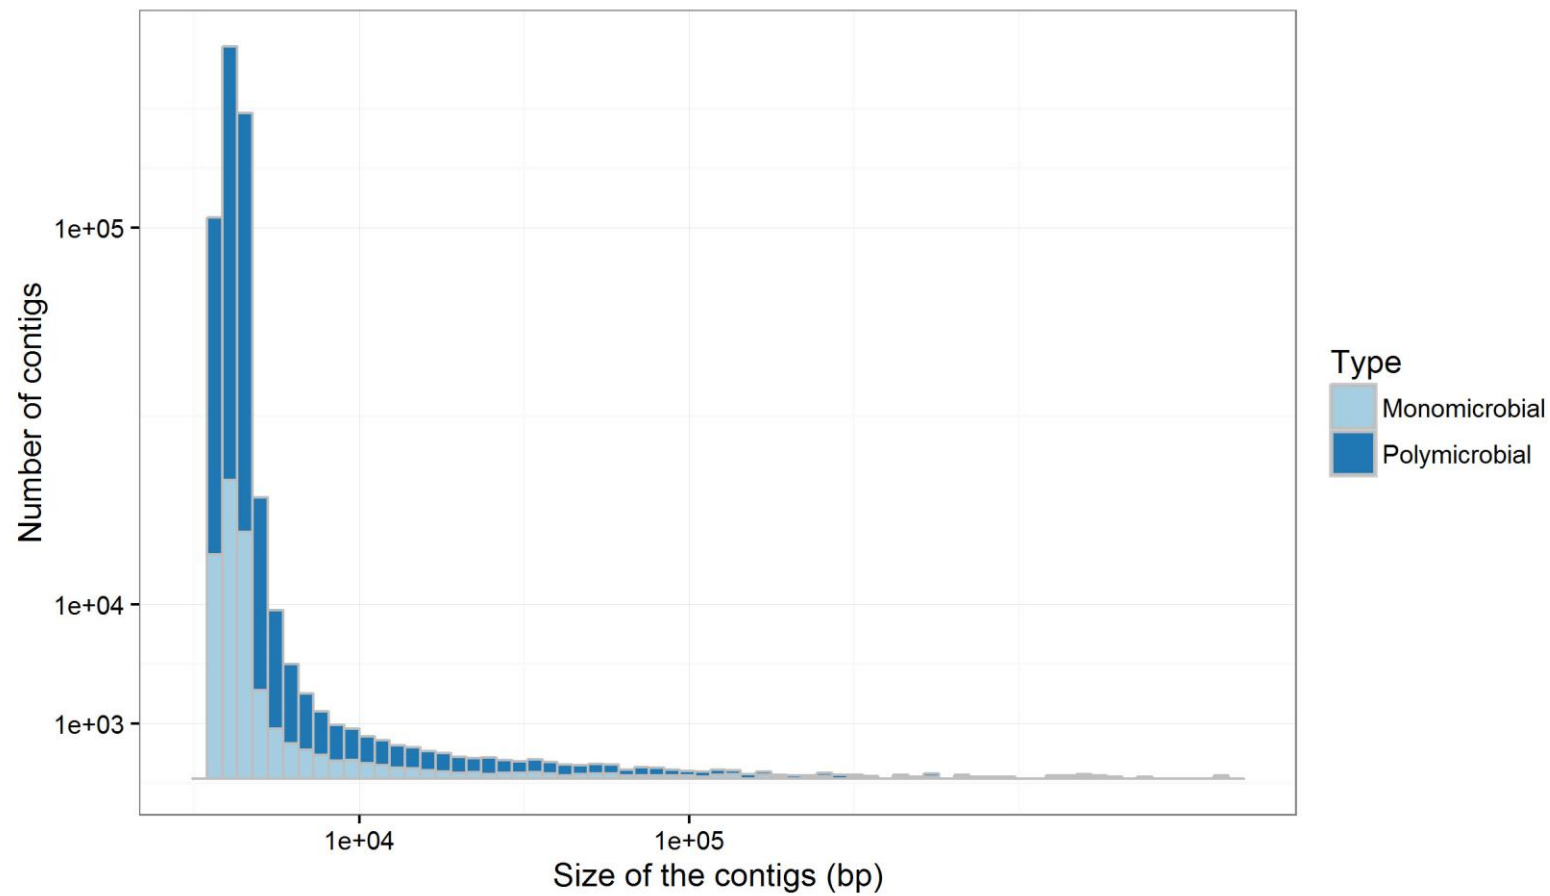

2

3

1 **Supplementary Figure 5:** (A) Dot plot of the abundance of the species (Log10) that were considered as contaminants in this study (see supplementary Table  
 2 1) along with the total DNA (sum of bacterial and human DNA) concentrations (pg/ $\mu$ L). The blue line depicts the linear regression between the abundances of  
 3 the species (Log10) and the Log10 of the DNA concentrations. (B) Dot plot of the abundance of *Propionibacterium acnes* (%) along with the total DNA (sum  
 4 of bacterial and human DNA) concentrations (pg/ $\mu$ L). Samples with an abundance of 0 are also showed. The blue line depicts the linear regression between  
 5 the abundances of the species and the Log10 of the DNA concentrations.

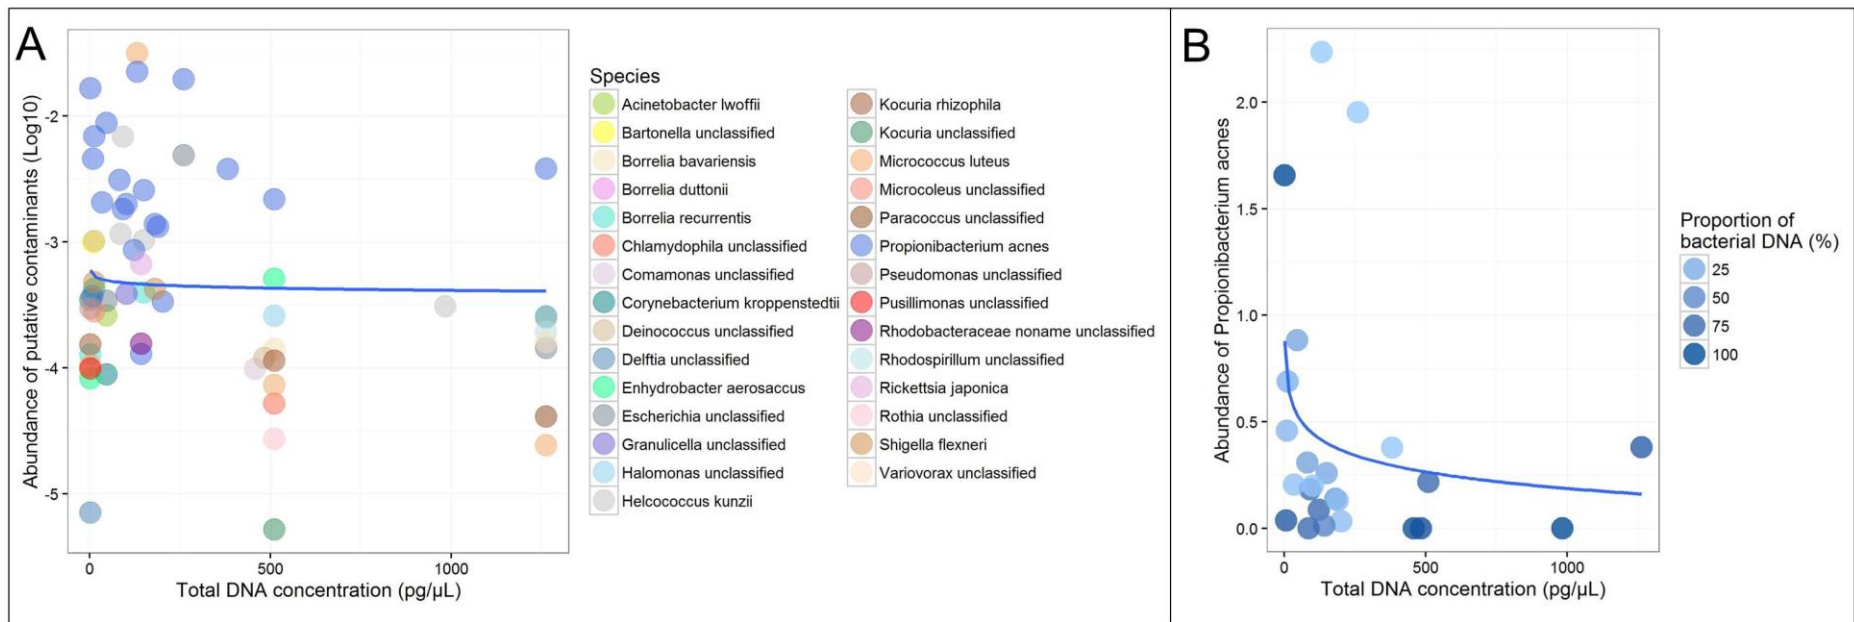

6

7

- 1 **Supplementary Figure 6:** Distribution of the abundances (%) of *Propionibacterium propionicum* (purple) and *Propionibacterium acnes* (green) in the 22
- 2 samples where they were identified.

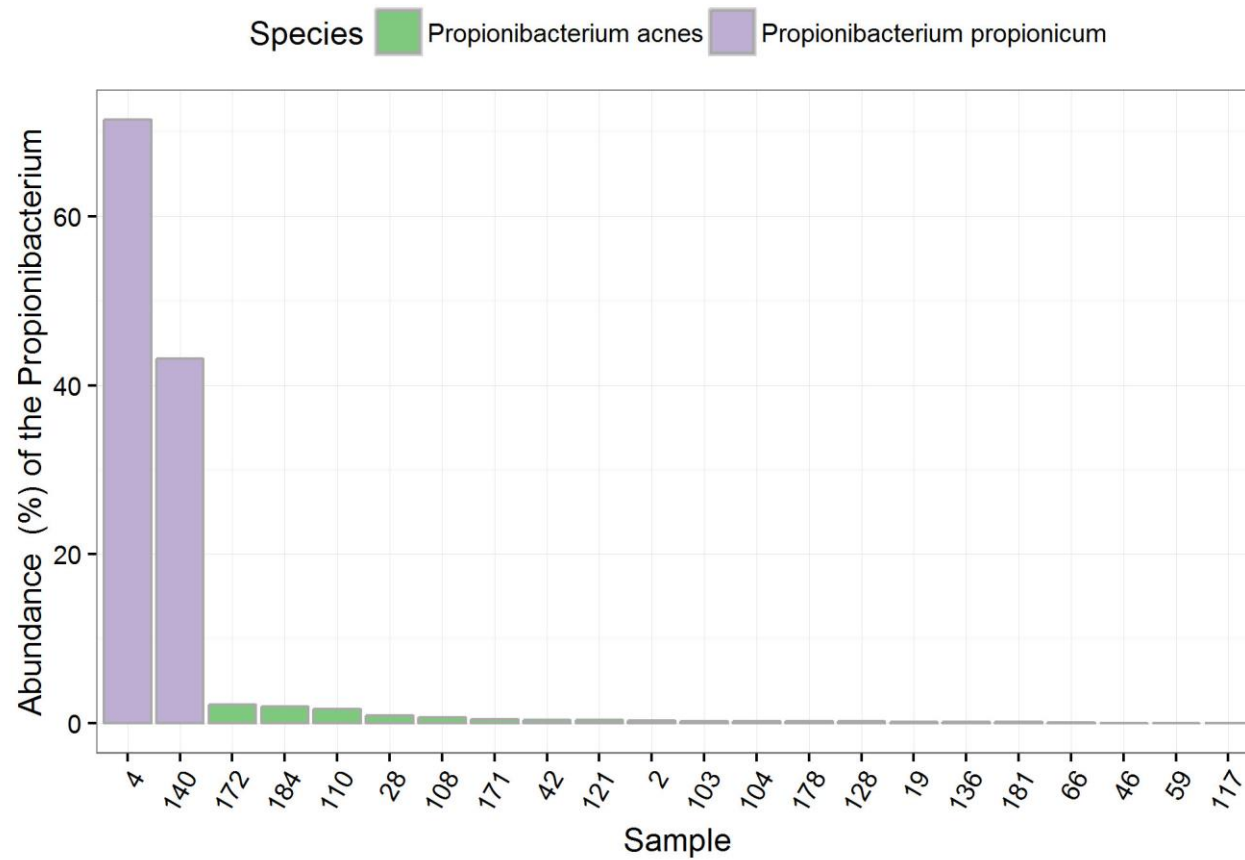

- 3
- 4

1 **Supplementary Figure 7:** Examples of the assessment of a polyclonal population within species. A: The Tablet view of a 5,749 bp contig from *Morganella*  
2 *morganii* in sample 4. B: The dot-plot of the number of SNVs and the size of the contigs from *Morganella morganii* in sample 4 (Pearson's correlation test  
3  $p < 0.001$ ). C: The Tablet view of a 19,205 bp contig from *Staphylococcus aureus* in sample 121. In this species, the SNVs are concentrated in some regions  
4 (such as the one showed) and not homogeneously scattered. D: The dot-plot of the number of SNVs and the size of the contigs from *Staphylococcus aureus*  
5 in sample 121 (Pearson's correlation test  $p = 0.4$ ).

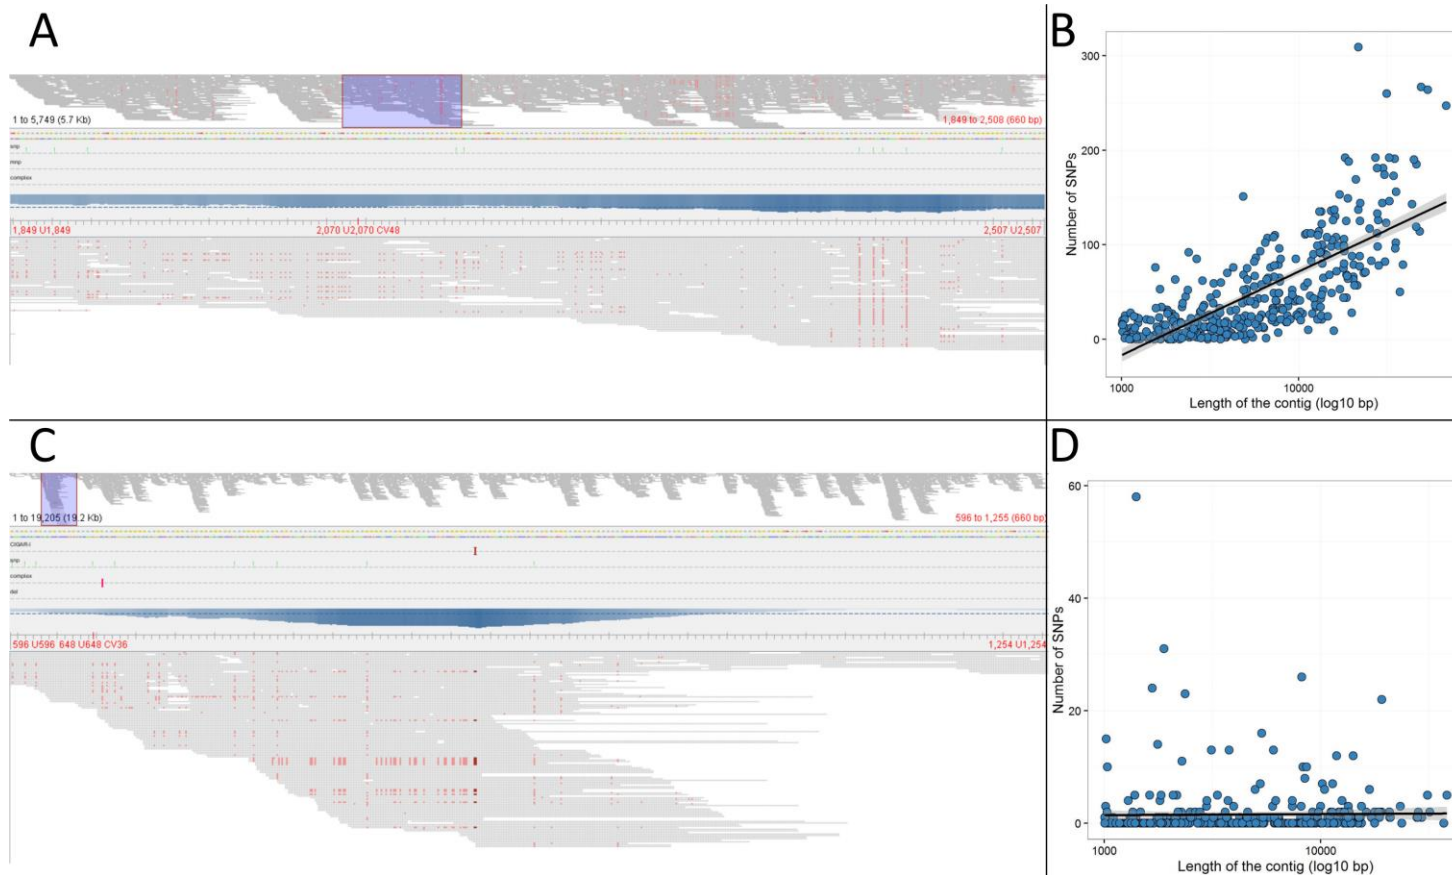

6

- 1 **Supplementary Figure 8:** Bar plot of the median depth of sequencing (expressed in  $\times$ ) of the contigs
- 2 of the bacterial species (in green) and depth of sequencing of the ARDs (in orange) found in the
- 3 sample.

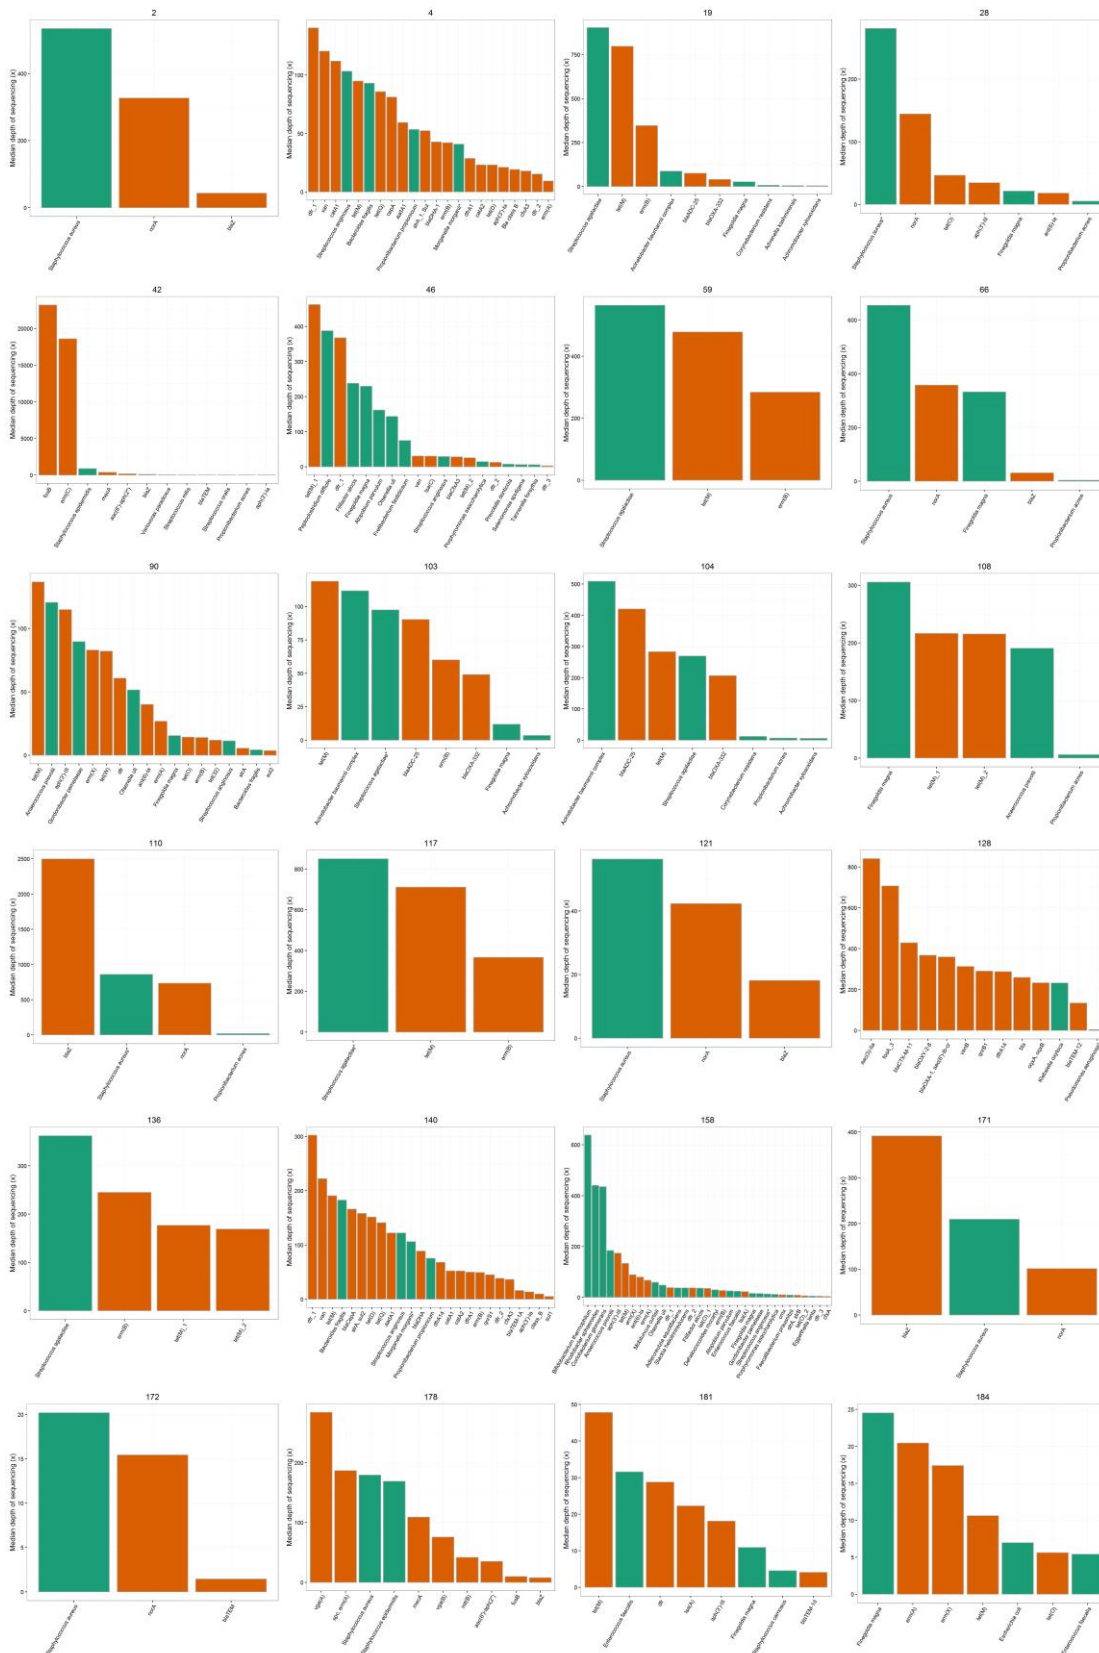

4

- 1 **Supplementary Figure 9:** Influence of the downsizing to 1M reads on the taxonomic classification of
- 2 reads by MetaPhlan2. The outer and the inner circles represent the distribution of the main species
- 3 with no and 1M downsize, respectively.

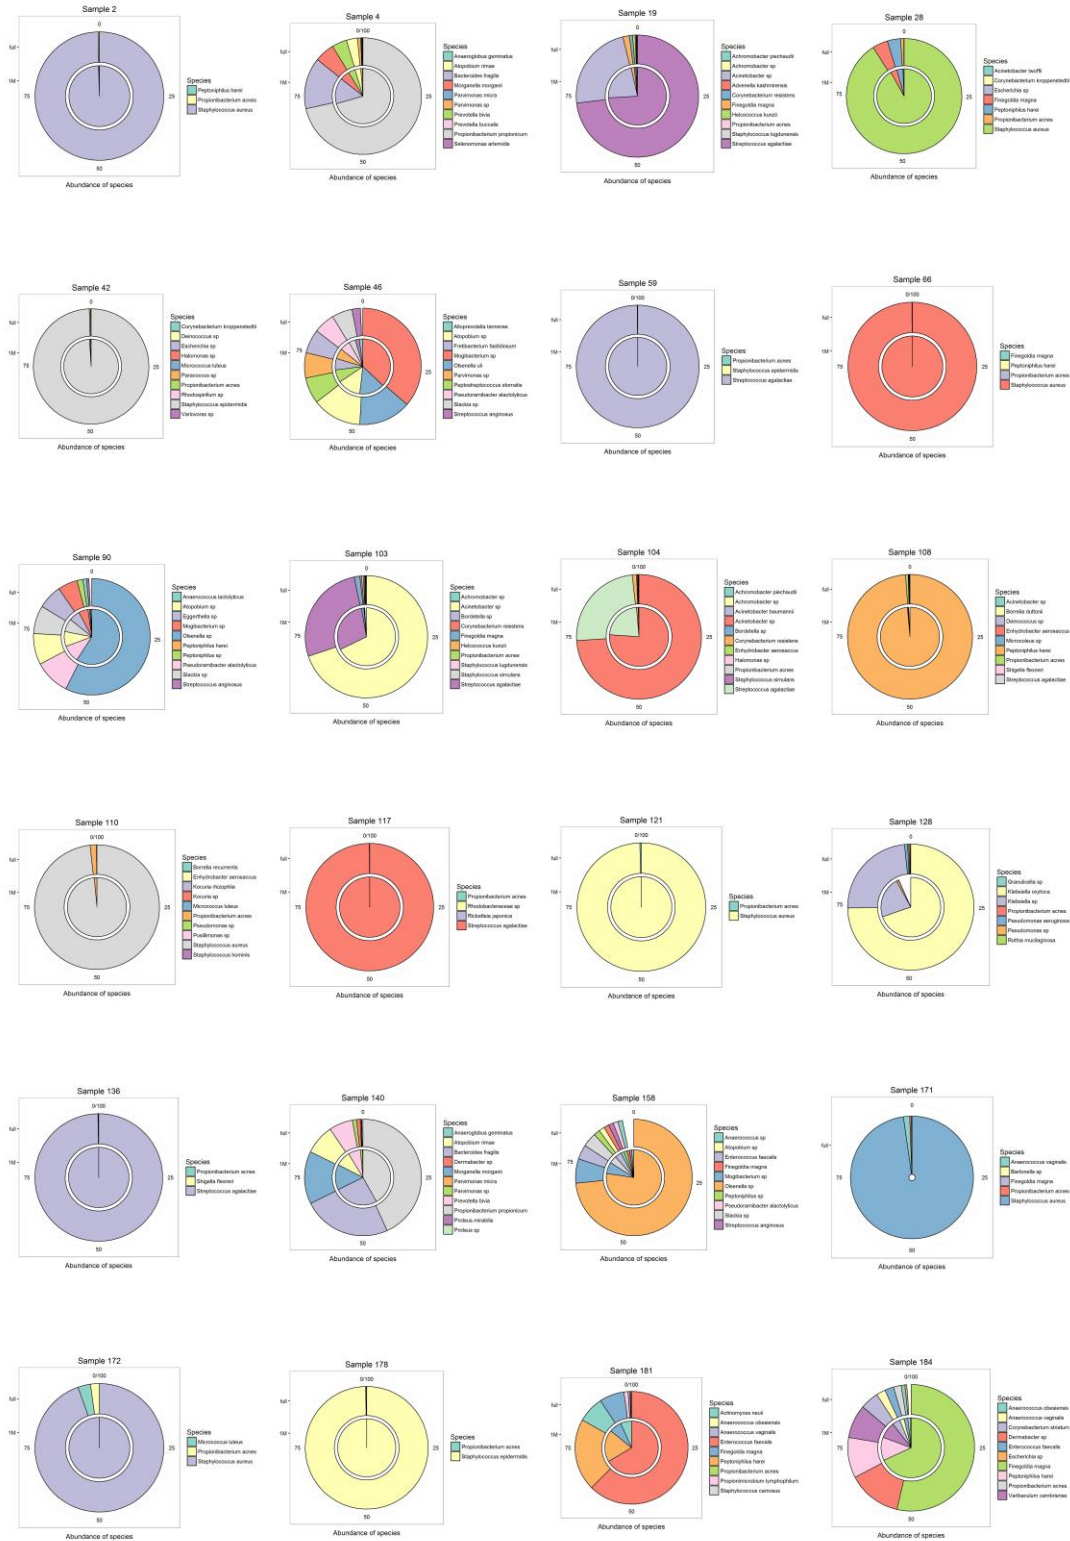

- 1 **Supplementary Figure 10:** Effect of downsizing to 1M reads on the assembly performances for all samples (n=24). Paired t-tests were performed. ARDs: antibiotic resistance determinants. The genes of interest included *gyrA*, *parC* and *rpoB* (with sizes over 80% of the reference genes). \*\*\*:  $p < 0.001$ ; \*\*:  $p < 0.01$ ;
- 2 NS: not significant. The shaded grey area depicts the 95% confidence interval around the linear regression line.
- 3

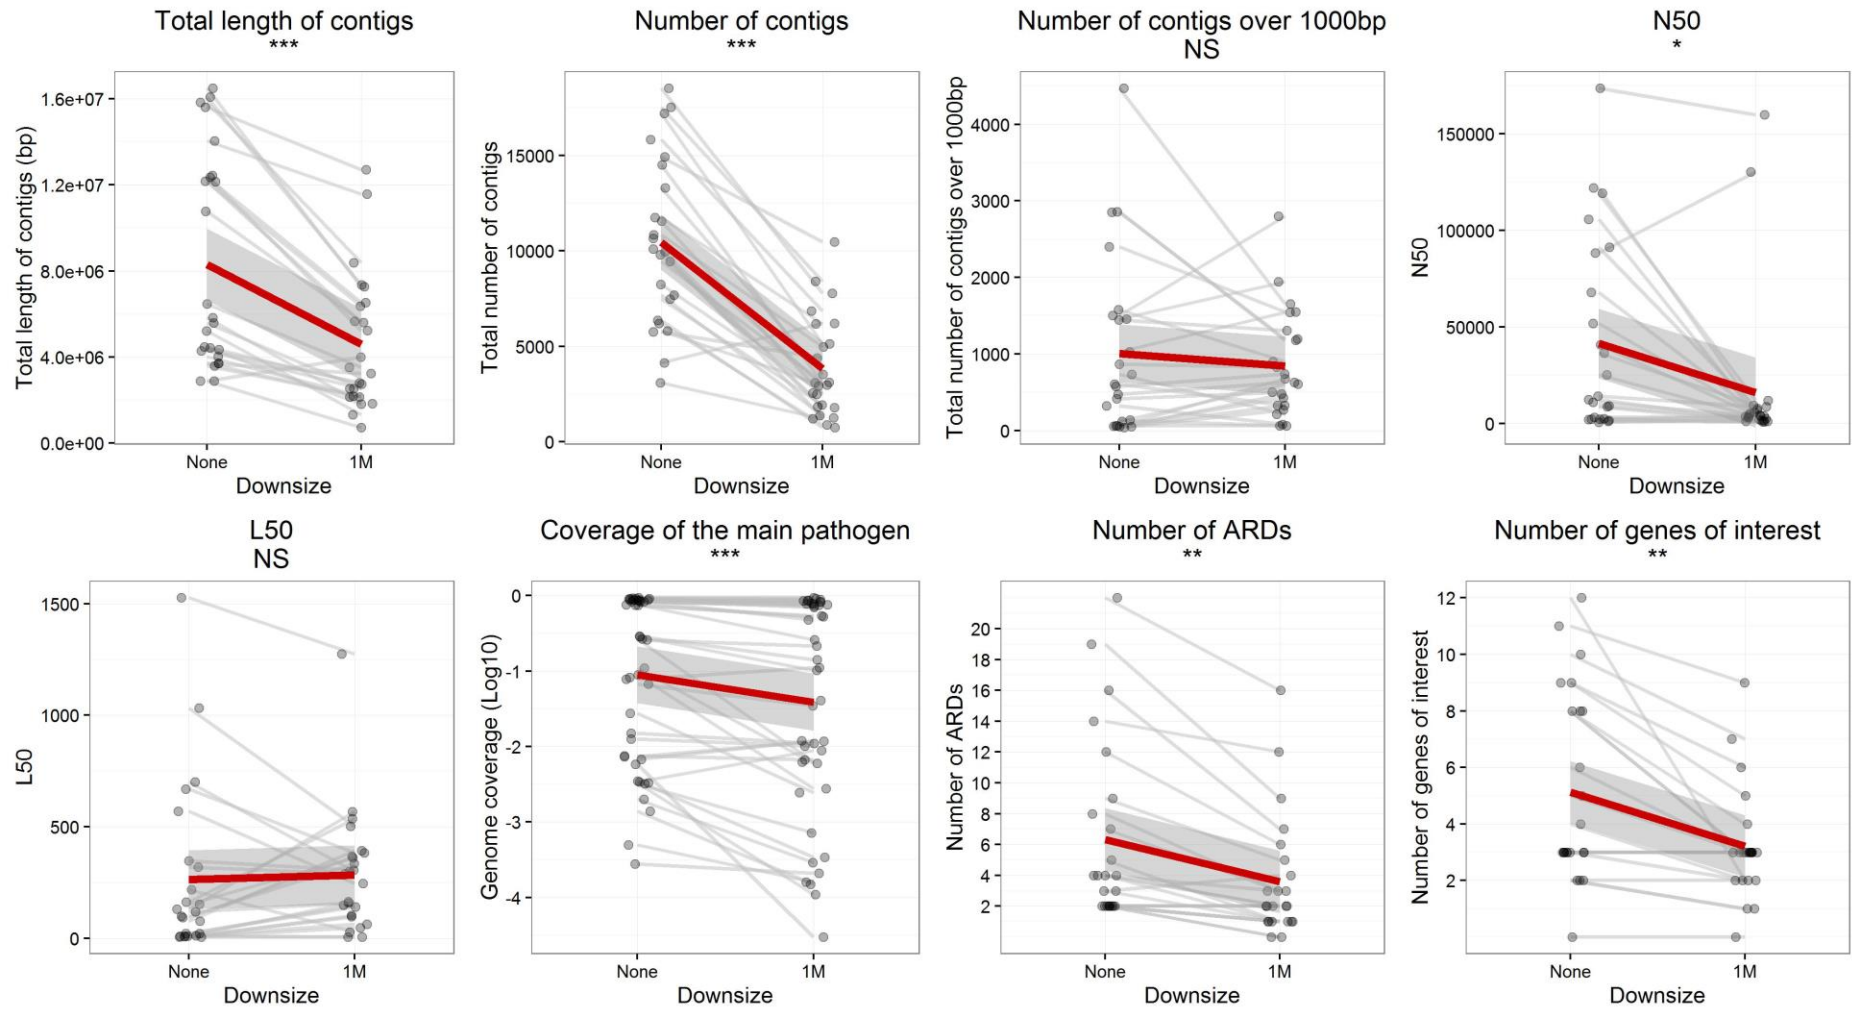

- 1 **Supplementary Figure 11:** Effect of downsizing to 1M reads on the assembly performances for monomicrobial samples (n=8). Paired t-tests were performed.
- 2 ARDs: antibiotic resistance determinants. The genes of interest included *gyrA*, *parC* and *rpoB* (with sizes over 80% of the reference genes). \*\*\*: p<0.001;
- 3 \*\*:p<0.01; NS: not significant. The shaded grey area depicts the 95% confidence interval around the linear regression line.

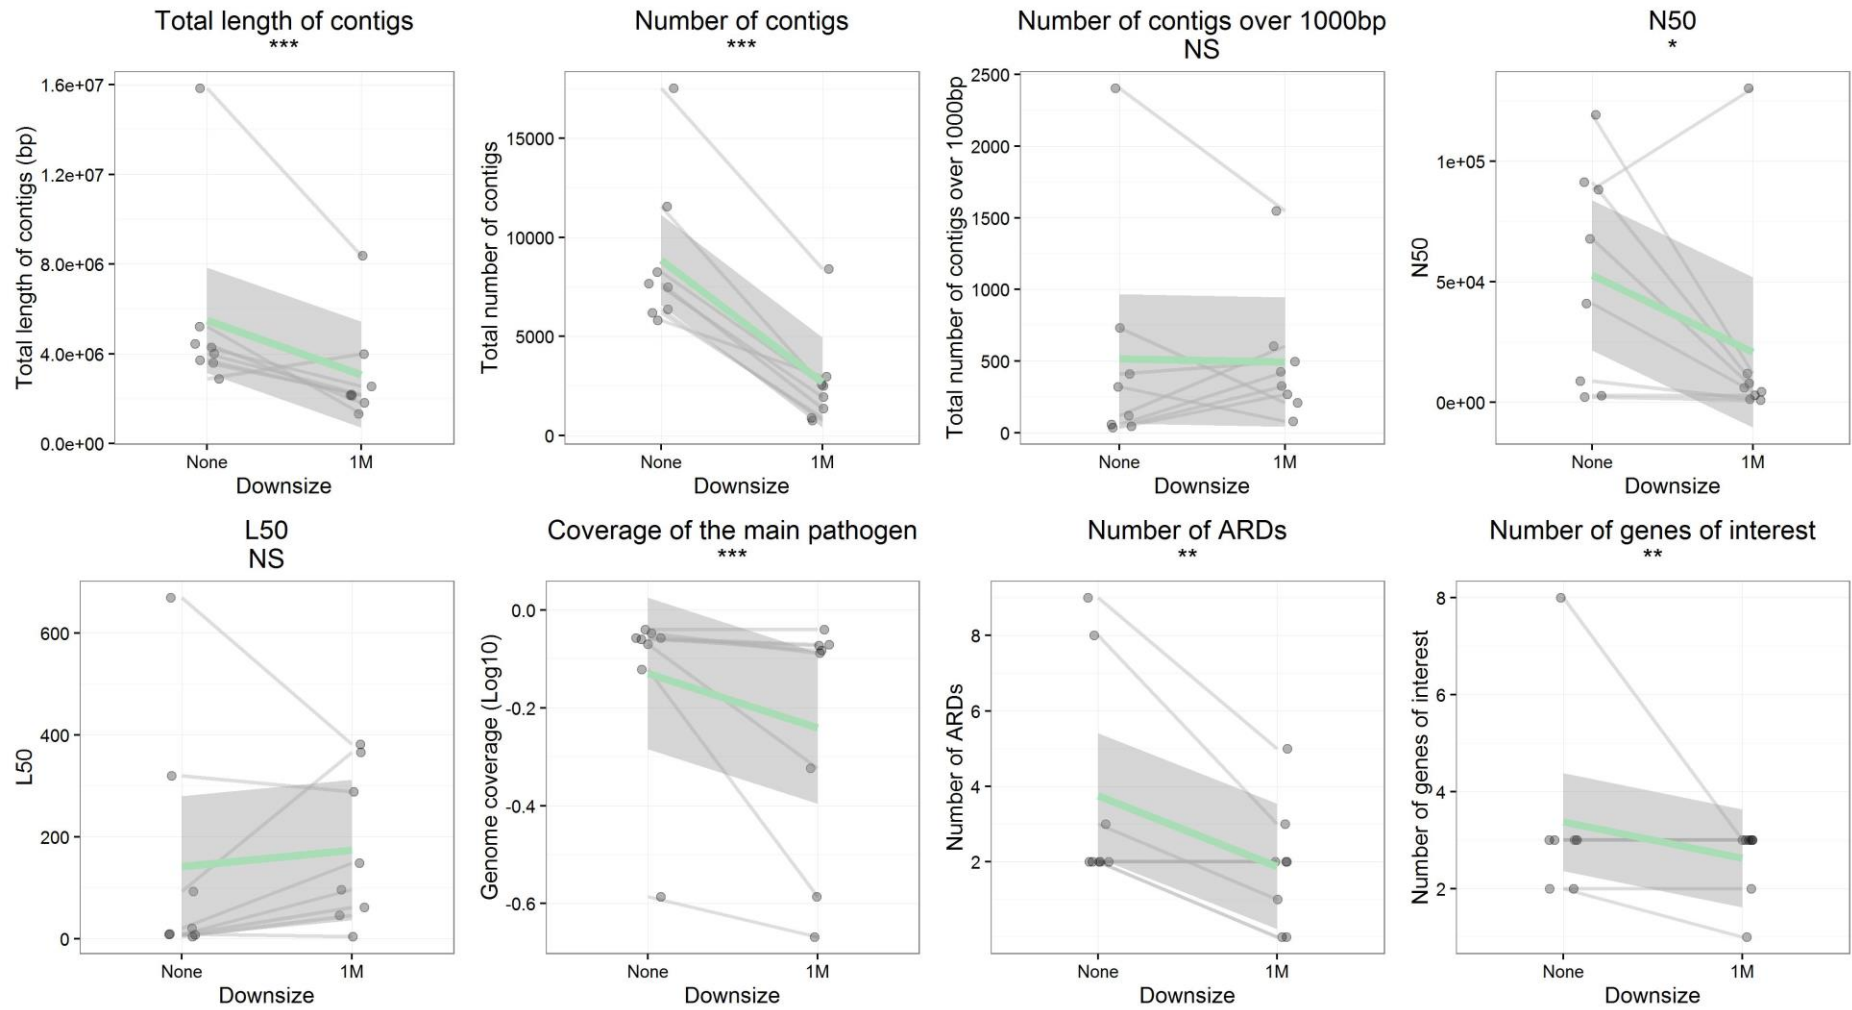



- 1 **Supplementary Figure 12:** Effect of downsizing to 1M reads on the assembly performances for polymicrobial samples (n=16). Paired t-tests were performed.
- 2 ARDs: antibiotic resistance determinants. The genes of interest included *gyrA*, *parC* and *rpoB* (with sizes over 80% of the reference genes). \*\*\*: p<0.001;
- 3 \*\*:p<0.01; NS: not significant. The shaded grey area depicts the 95% confidence interval around the linear regression line.

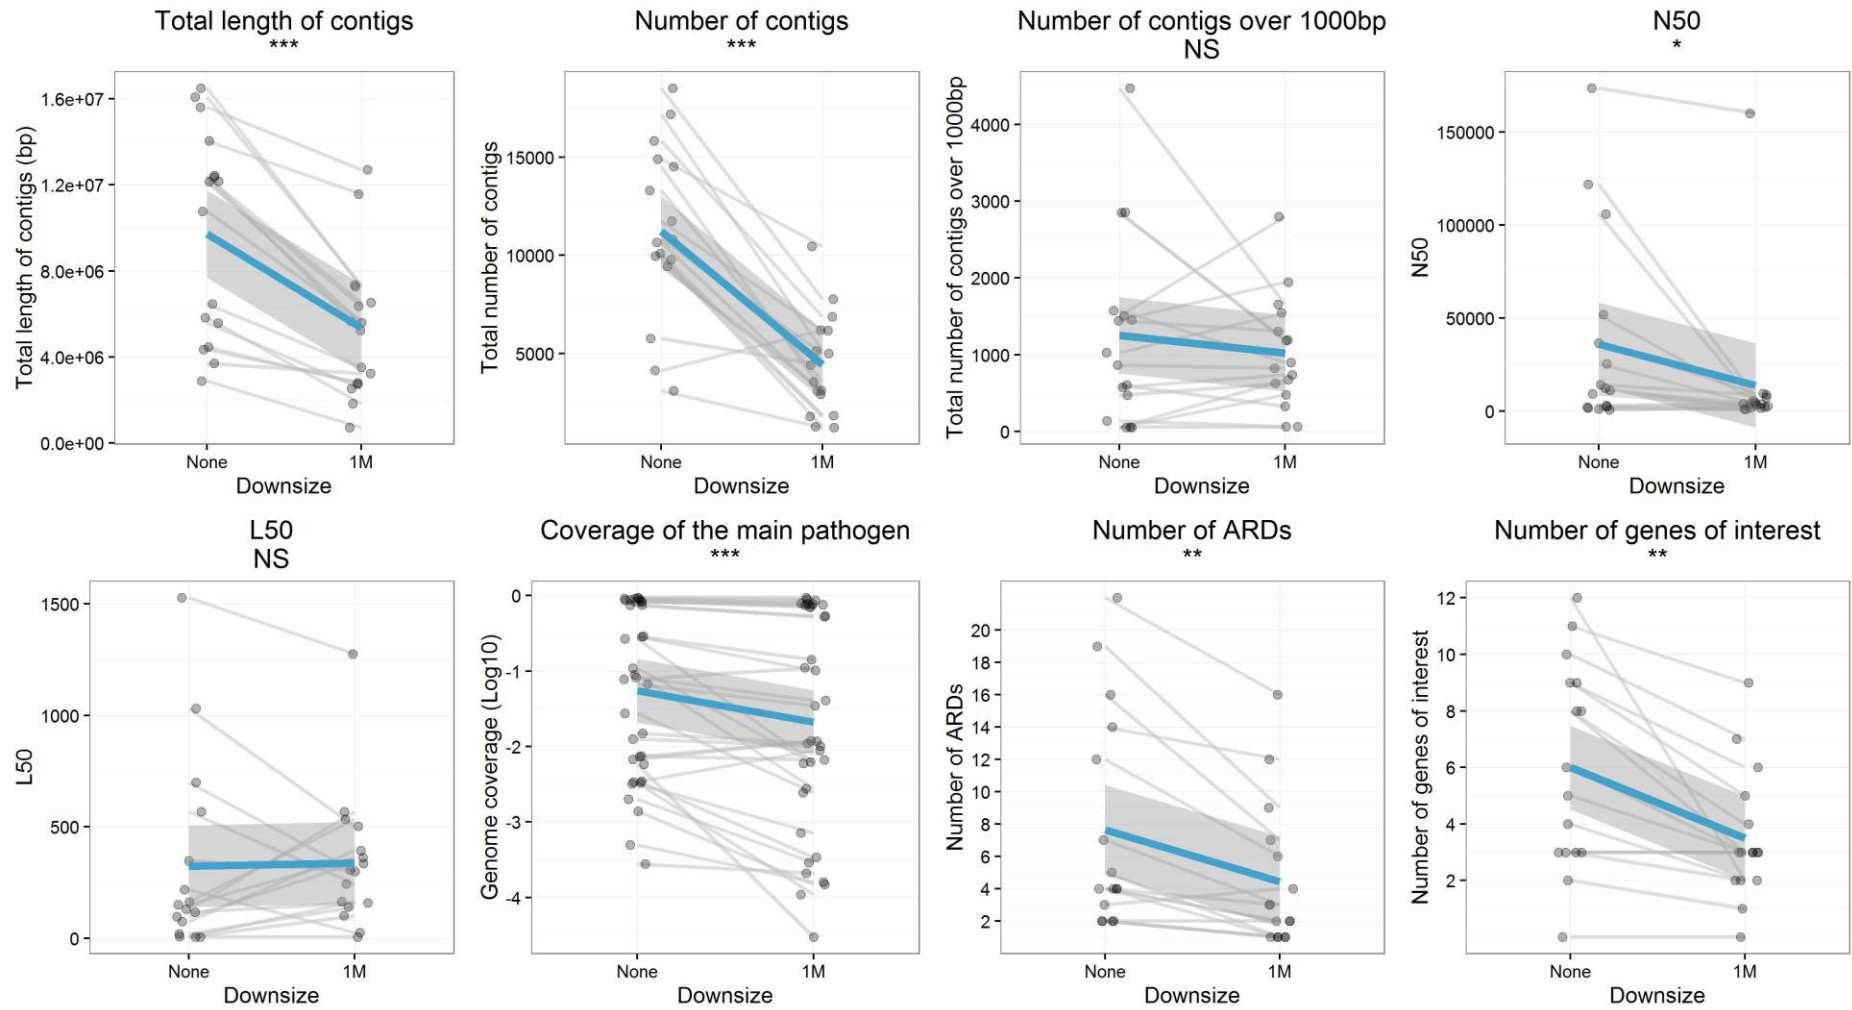

1 **Supplementary Tables legend**

2 **Supplementary Table 1:** Summary of the sequencing and assembly results for the 24 samples. N50  
3 is the median contig size of the metagenomic assembly. L50 is the number of contigs that accounts  
4 for more than 50% of the metagenomic assembly.

5

6 **Supplementary Table 2:** Inference of antibiotic susceptibility from metagenomic data and antibiotic  
7 susceptibility of the bacteria found in culture.

8

9

10

11

12

13

14

15

16

17

18

19

20

21
